# Supplementary material for: Pinnatifidenyne-Derived Ethynyl Oxirane Acetogenins from Laurencia viridis
Source: PubMed Central journal article supplement (PMC5793053; doi:10.3390/md16010005), 2017-12-29
Supplement: marinedrugs-16-00005-s001.pdf [file marinedrugs-16-00005-s001.pdf]

# Supporting Information

## Pinnatifidenyne-derived ethynyl oxirane acetogenins from *Laurencia viridis*

**Adrián Morales-Amador**<sup>1,2</sup>, **Caterina R. de Vera**<sup>1,2</sup>, **Olivia Márquez-Fernández**<sup>3</sup>,  
**Antonio Hernández Daranas**<sup>1,4</sup>, **José M. Padrón**<sup>1</sup>, **José J. Fernández**<sup>1,2,\*</sup>, **María L.  
Souto**<sup>1,2,\*</sup> and **Manuel Norte**<sup>1,2,\*</sup>

- <sup>1</sup> Instituto Universitario de Bio-Orgánica Antonio González (IUBO AG), Centro de Investigaciones Biomédicas de Canarias (CIBICAN), Universidad de La Laguna (ULL), Avenida Astrofísico Francisco Sánchez 2, 38206, Tenerife, Spain; E-Mails: [adrian\\_tf@hotmail.com](mailto:adrian_tf@hotmail.com) (A.M.-A.); [caterina.rdv@gmail.com](mailto:caterina.rdv@gmail.com) (C.R.V.); [adaranas@ull.es](mailto:adaranas@ull.es) (A.H.D.); [jmpadron@ull.es](mailto:jmpadron@ull.es) (J.M.P.); [jjfercas@ull.es](mailto:jjfercas@ull.es) (J.J.F.); [msouto@ull.es](mailto:msouto@ull.es) (M.L.S.); [mnorte@ull.es](mailto:mnorte@ull.es) (M.N.)
- <sup>2</sup> Departamento de Química Orgánica, Universidad de La Laguna (ULL), Avenida Astrofísico Francisco Sánchez s/n, 38206, Tenerife, Spain
- <sup>3</sup> Facultad de Ciencias Biológicas-Universidad Veracruzana, Circuito Gonzalo Aguirre Beltrán s/n, Zona Universitaria C.P. 91090, Xalapa, Veracruz, México; E-Mail: [mafo68@yahoo.com.mx](mailto:mafo68@yahoo.com.mx) (O.M.-F.)
- <sup>4</sup> Instituto de Productos Naturales y Agrobiología (IPNA), CSIC, Avenida Astrofísico Francisco Sánchez 2, 38206, Tenerife, Spain

## Table of contents

|                                                                                                                                                                                                                | Page |
|----------------------------------------------------------------------------------------------------------------------------------------------------------------------------------------------------------------|------|
| <b>Scheme S1.</b> Isolation procedure for new acetogenins.                                                                                                                                                     | 4    |
| <b>Figure S1.</b> <sup>1</sup> H-NMR spectrum (600 MHz, CDCl <sub>3</sub> ) for (3 <i>R</i> ,4 <i>S</i> )-epoxy-pinnatifidenyne <b>3</b> .                                                                     | 5    |
| <b>Figure S2.</b> <sup>13</sup> C-NMR spectrum (150 MHz, CDCl <sub>3</sub> ) for (3 <i>R</i> ,4 <i>S</i> )-epoxy-pinnatifidenyne <b>3</b> .                                                                    | 6    |
| <b>Figure S3.</b> COSY <sup>1</sup> H- <sup>1</sup> H spectrum (600 MHz, CDCl <sub>3</sub> ) for (3 <i>R</i> ,4 <i>S</i> )-epoxy-pinnatifidenyne <b>3</b> .                                                    | 7    |
| <b>Figure S4.</b> HSQCed spectrum (600 MHz, CDCl <sub>3</sub> ) for (3 <i>R</i> ,4 <i>S</i> )-epoxy-pinnatifidenyne <b>3</b> .                                                                                 | 8    |
| <b>Figure S5.</b> HMBC spectrum (600 MHz, CDCl <sub>3</sub> ) for (3 <i>R</i> ,4 <i>S</i> )-epoxy-pinnatifidenyne <b>3</b> .                                                                                   | 9    |
| <b>Figure S6.</b> ROESY spectrum (600 MHz, CDCl <sub>3</sub> ) for (3 <i>R</i> ,4 <i>S</i> )-epoxy-pinnatifidenyne <b>3</b> .                                                                                  | 10   |
| <b>Figure S7.</b> HSQC-HECADE spectrum (600 MHz, CDCl <sub>3</sub> ) for (3 <i>R</i> ,4 <i>S</i> )-epoxy-pinnatifidenyne <b>3</b> .                                                                            | 11   |
| <b>Figure S8.</b> 1D NOESY spectra (600 MHz, CDCl <sub>3</sub> ) for (3 <i>R</i> ,4 <i>S</i> )-epoxy-pinnatifidenyne <b>3</b> .                                                                                | 12   |
| <b>Figure S9.</b> HRESIMS spectrum for (3 <i>R</i> ,4 <i>S</i> )-epoxy-pinnatifidenyne <b>3</b> .                                                                                                              | 13   |
| <b>Figure S10.</b> <sup>1</sup> H-NMR spectrum (600 MHz, CDCl <sub>3</sub> ) for (3 <i>S</i> ,4 <i>R</i> )-epoxy-pinnatifidenyne <b>4</b> .                                                                    | 14   |
| <b>Figure S11.</b> <sup>13</sup> C-NMR spectrum (150 MHz, CDCl <sub>3</sub> ) for (3 <i>S</i> ,4 <i>R</i> )-epoxy-pinnatifidenyne <b>4</b> .                                                                   | 15   |
| <b>Figure S12.</b> HSQCed spectrum (600 MHz, CDCl <sub>3</sub> ) for (3 <i>S</i> ,4 <i>R</i> )-epoxy-pinnatifidenyne <b>4</b> .                                                                                | 16   |
| <b>Figure S13.</b> COSY <sup>1</sup> H- <sup>1</sup> H spectrum (600 MHz, CDCl <sub>3</sub> ) for (3 <i>S</i> ,4 <i>R</i> )-epoxy-pinnatifidenyne <b>4</b> .                                                   | 17   |
| <b>Figure S14.</b> HMBC spectrum (600 MHz, CDCl <sub>3</sub> ) for (3 <i>S</i> ,4 <i>R</i> )-epoxy-pinnatifidenyne <b>4</b> .                                                                                  | 18   |
| <b>Figure S15.</b> ROESY spectrum (600 MHz, CDCl <sub>3</sub> ) for (3 <i>S</i> ,4 <i>R</i> )-epoxy-pinnatifidenyne <b>4</b> .                                                                                 | 19   |
| <b>Figure S16.</b> 1D NOESY spectra (600 MHz, CDCl <sub>3</sub> ) for (3 <i>S</i> ,4 <i>R</i> )-epoxy-pinnatifidenyne <b>4</b> .                                                                               | 20   |
| <b>Figure S17.</b> HRESIMS spectrum for (3 <i>S</i> ,4 <i>R</i> )-epoxy-pinnatifidenyne <b>4</b> .                                                                                                             | 21   |
| <b>Figure S18.</b> <sup>1</sup> H-NMR spectrum (600 MHz, CDCl <sub>3</sub> ) for (9 <i>R</i> ,10 <i>S</i> )-epoxy-Z-pinnatifidenyne <b>5</b> .                                                                 | 22   |
| <b>Figure S19.</b> HSQCed spectrum (600 MHz, CDCl <sub>3</sub> ) for (9 <i>R</i> ,10 <i>S</i> )-epoxy-Z-pinnatifidenyne <b>5</b> .                                                                             | 23   |
| <b>Figure S20.</b> COSY <sup>1</sup> H- <sup>1</sup> H spectrum (600 MHz, CDCl <sub>3</sub> ) for (9 <i>R</i> ,10 <i>S</i> )-epoxy-Z-pinnatifidenyne <b>5</b> .                                                | 24   |
| <b>Figure S21.</b> HMBC spectrum (600 MHz, CDCl <sub>3</sub> ) for (9 <i>R</i> ,10 <i>S</i> )-epoxy-Z-pinnatifidenyne <b>5</b> .                                                                               | 25   |
| <b>Figure S22.</b> ROESY spectrum (600 MHz, CDCl <sub>3</sub> ) for (9 <i>R</i> ,10 <i>S</i> )-epoxy-Z-pinnatifidenyne <b>5</b> .                                                                              | 26   |
| <b>Figure S23.</b> 1D NOESY spectra (600 MHz, CDCl <sub>3</sub> ) for (9 <i>R</i> ,10 <i>S</i> )-epoxy-Z-pinnatifidenyne <b>5</b> .                                                                            | 27   |
| <b>Figure S24.</b> HRESIMS spectrum for (9 <i>R</i> ,10 <i>S</i> )-epoxy-Z-pinnatifidenyne <b>5</b> .                                                                                                          | 28   |
| <b>Figure S25.</b> <sup>1</sup> H-NMR spectrum (600 MHz, CDCl <sub>3</sub> ) for pinnatifidehyde <b>6</b> .                                                                                                    | 29   |
| <b>Figure S26.</b> <sup>13</sup> C-NMR spectrum (125 MHz, CDCl <sub>3</sub> ) for pinnatifidehyde <b>6</b> .                                                                                                   | 30   |
| <b>Figure S27.</b> COSY <sup>1</sup> H- <sup>1</sup> H spectrum (600 MHz, CDCl <sub>3</sub> ) for pinnatifidehyde <b>6</b> .                                                                                   | 31   |
| <b>Figure S28.</b> HSQC spectrum (600 MHz, CDCl <sub>3</sub> ) for pinnatifidehyde <b>6</b> .                                                                                                                  | 32   |
| <b>Figure S29.</b> HMBC spectrum (600 MHz, CDCl <sub>3</sub> ) for pinnatifidehyde <b>6</b> .                                                                                                                  | 33   |
| <b>Figure S30.</b> ROESY spectrum (600 MHz, CDCl <sub>3</sub> ) for pinnatifidehyde <b>6</b> .                                                                                                                 | 34   |
| <b>Figure S31.</b> HRESIMS spectrum for pinnatifidehyde <b>6</b> .                                                                                                                                             | 35   |
| <b>Table S1.</b> Calculated vs experimental RMSD for compounds <b>3</b> and <b>4</b> .                                                                                                                         | 36   |
| <b>Table S2.</b> Scaled <sup>13</sup> C and <sup>1</sup> H chemical shifts for the two studied diastereoisomers on B3LYP-D3 in gas phase.                                                                      | 37   |
| <b>Figure S32.</b> Correlations plots for <sup>13</sup> C and <sup>1</sup> H calculated vs <sup>13</sup> C and <sup>1</sup> H experimental data for (3 <i>R</i> ,4 <i>S</i> )-epoxy-pinnatifidenyne <b>3</b> . | 38   |
| <b>Figure S33.</b> Correlations plots for <sup>13</sup> C and <sup>1</sup> H calculated vs <sup>13</sup> C and <sup>1</sup> H experimental data for (3 <i>S</i> ,4 <i>R</i> )-epoxy-pinnatifidenyne <b>4</b> . | 39   |
| <b>Table S3.</b> Conformer 1 of 12 (RS_1).                                                                                                                                                                     | 40   |
| <b>Table S4.</b> Conformer 2 of 12 (RS_2).                                                                                                                                                                     | 41   |
| <b>Table S5.</b> Conformer 3 of 12 (RS_7).                                                                                                                                                                     | 42   |
| <b>Table S6.</b> Conformer 4 of 12 (RS_11).                                                                                                                                                                    | 43   |

|                                                                                           |    |
|-------------------------------------------------------------------------------------------|----|
| <b>Table S7.</b> Conformer 5 of 12 (RS_12).                                               | 44 |
| <b>Table S8.</b> Conformer 6 of 12 (RS_12).                                               | 45 |
| <b>Table S9.</b> Conformer 7 of 12 (SR_1).                                                | 46 |
| <b>Table S10.</b> Conformer 8 of 12 (SR_10) .                                             | 47 |
| <b>Table S11.</b> Conformer 9 of 12 (SR_9).                                               | 48 |
| <b>Table S12.</b> Conformer 10 of 12 (RS_2).                                              | 49 |
| <b>Table S13.</b> Conformer 11 of 12 (SR_6).                                              | 50 |
| <b>Table S14.</b> Conformer 12 of 12 (SR_12).                                             | 51 |
| <b>Figure S34.</b> DP4 app for (3 <i>R</i> ,4 <i>S</i> )-epoxy-pinnatifidenyne <b>3</b> . | 52 |
| <b>Table S15.</b> Antiproliferative activity against human cancer cell lines.             | 53 |

**Scheme S1.** Isolation procedure for new acetogenins.

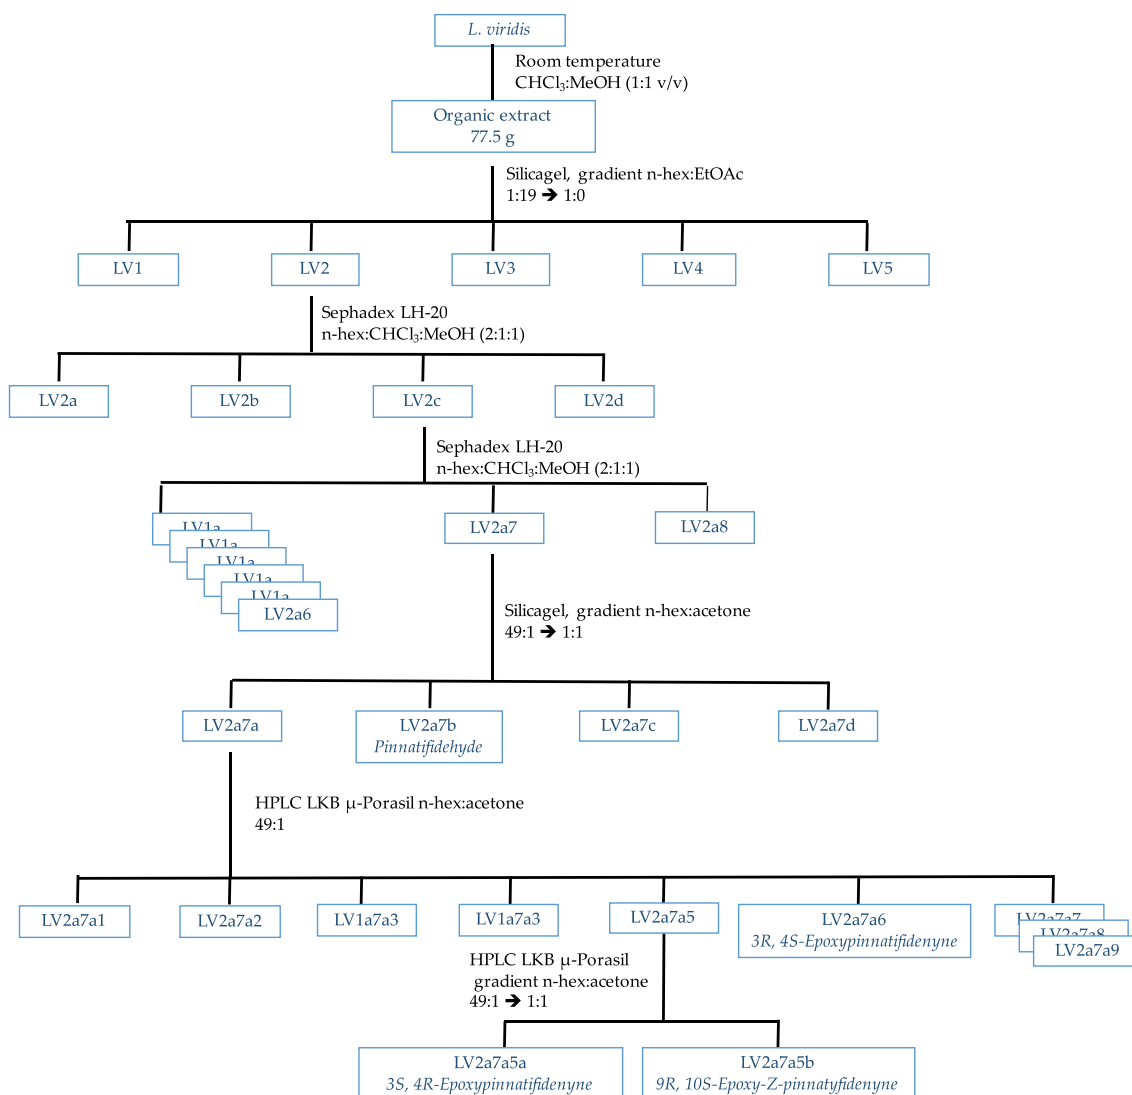

Figure S1. <sup>1</sup>H-NMR spectrum (600 MHz, CDCl<sub>3</sub>) for (3*R*,4*S*)-epoxy-pinnatifidenyne **3**.

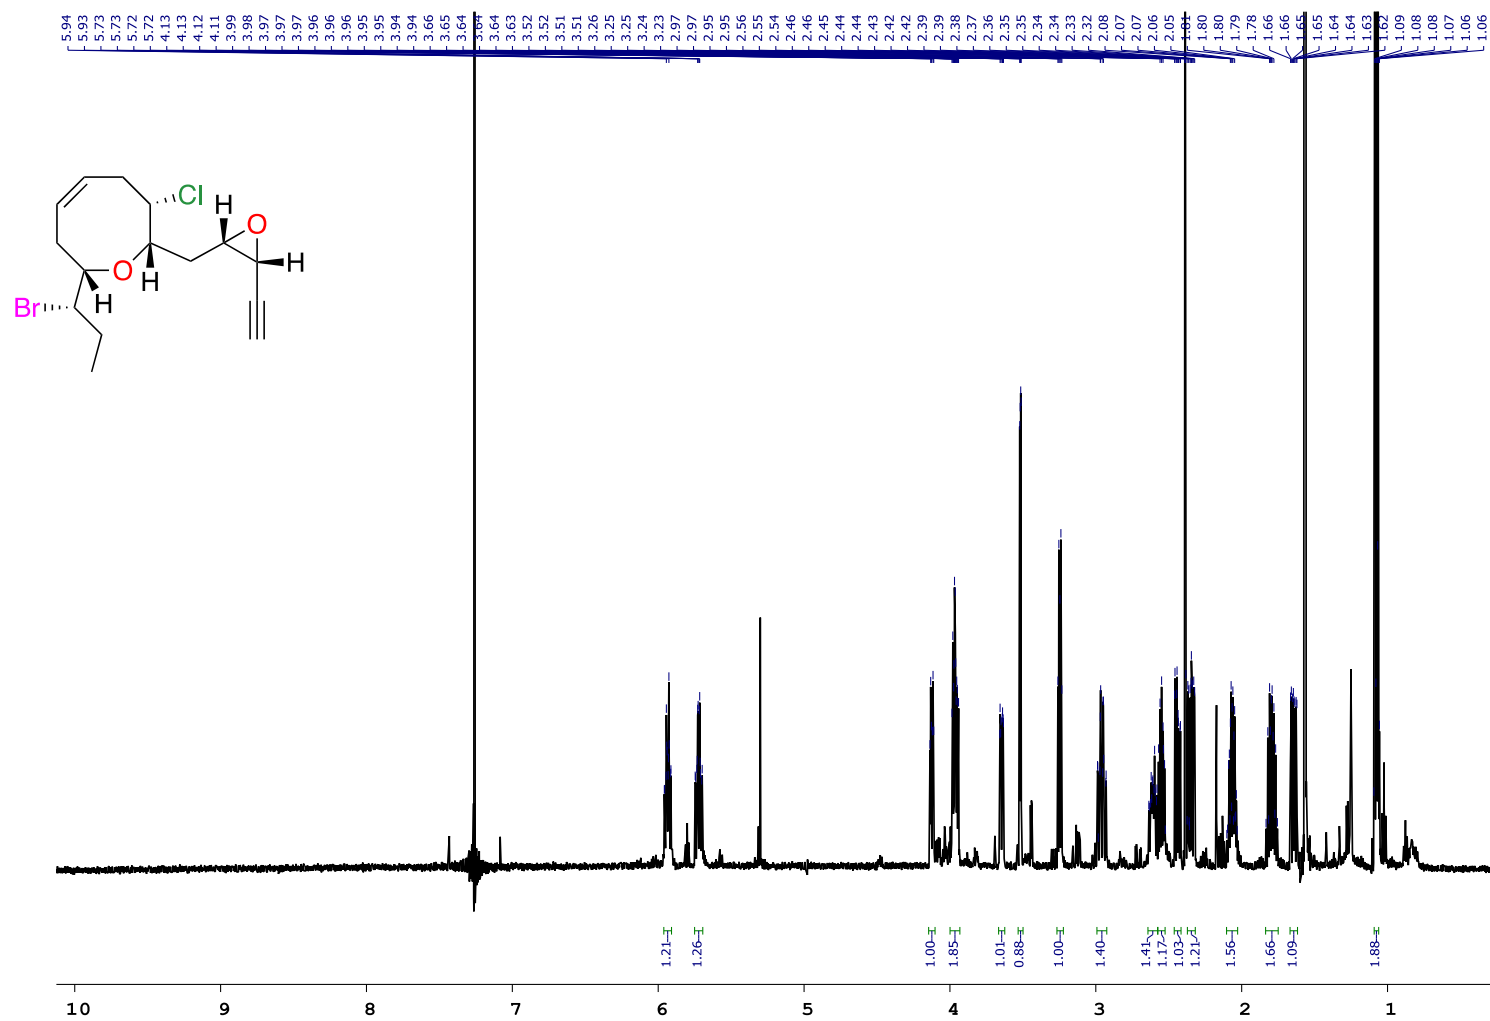

Figure S2.  $^{13}\text{C}$ -NMR spectrum (150 MHz,  $\text{CDCl}_3$ ) for (3*R*,4*S*)-epoxy-pinnatifidenyne **3**.

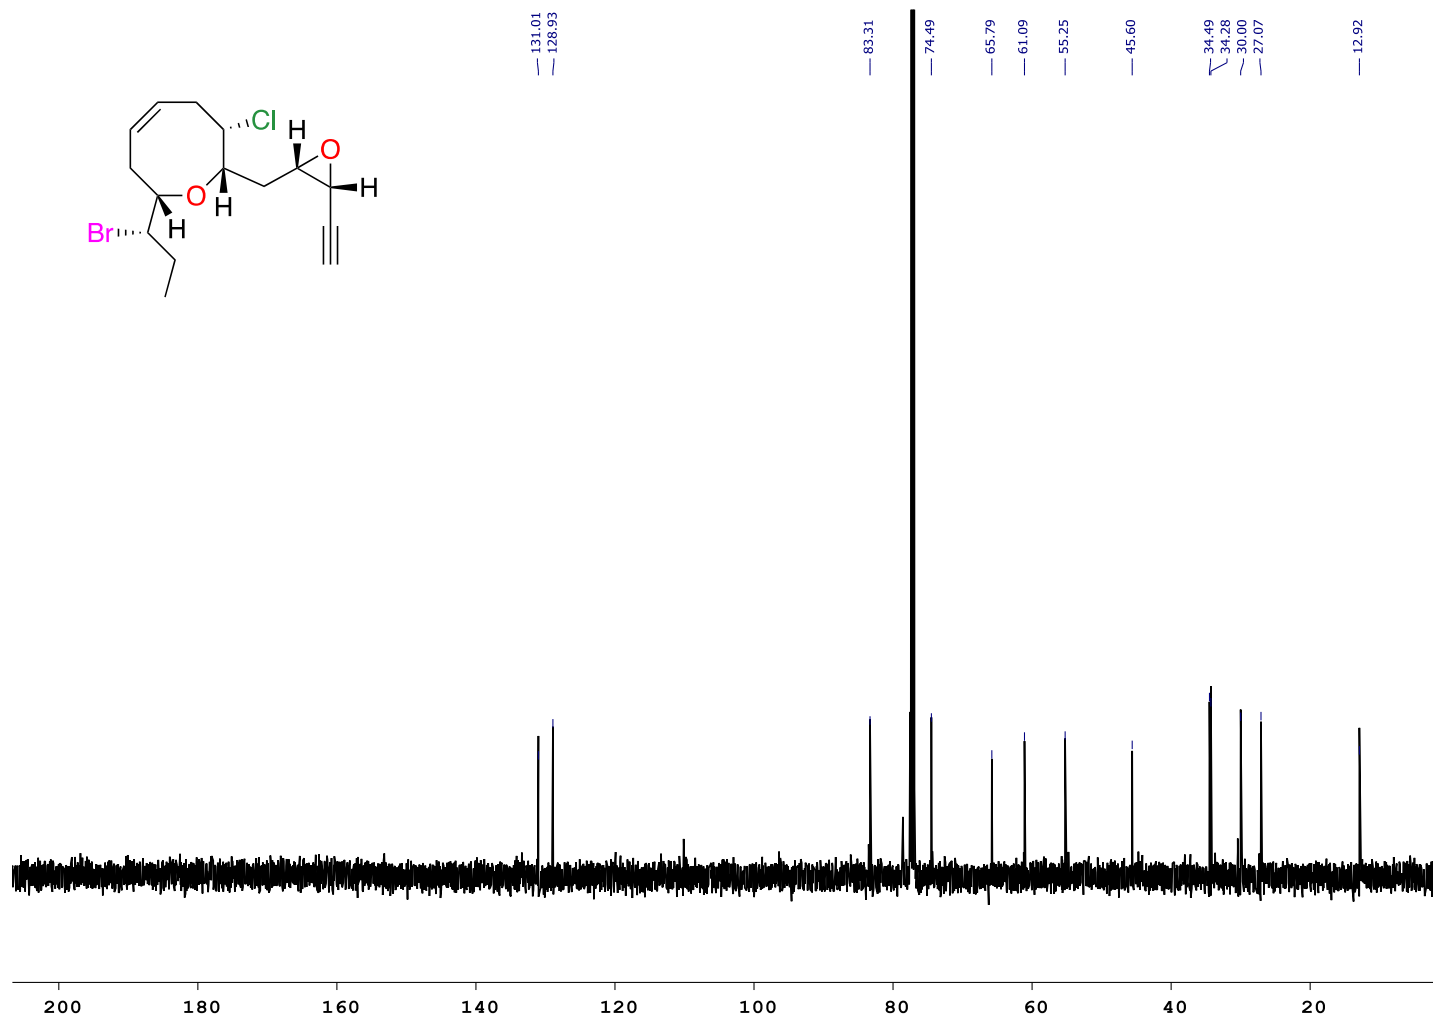

Figure S3. COSY  $^1\text{H}$ - $^1\text{H}$  spectrum (600 MHz,  $\text{CDCl}_3$ ) for (3*R*,4*S*)-epoxy-pinnatifidenyne **3**.

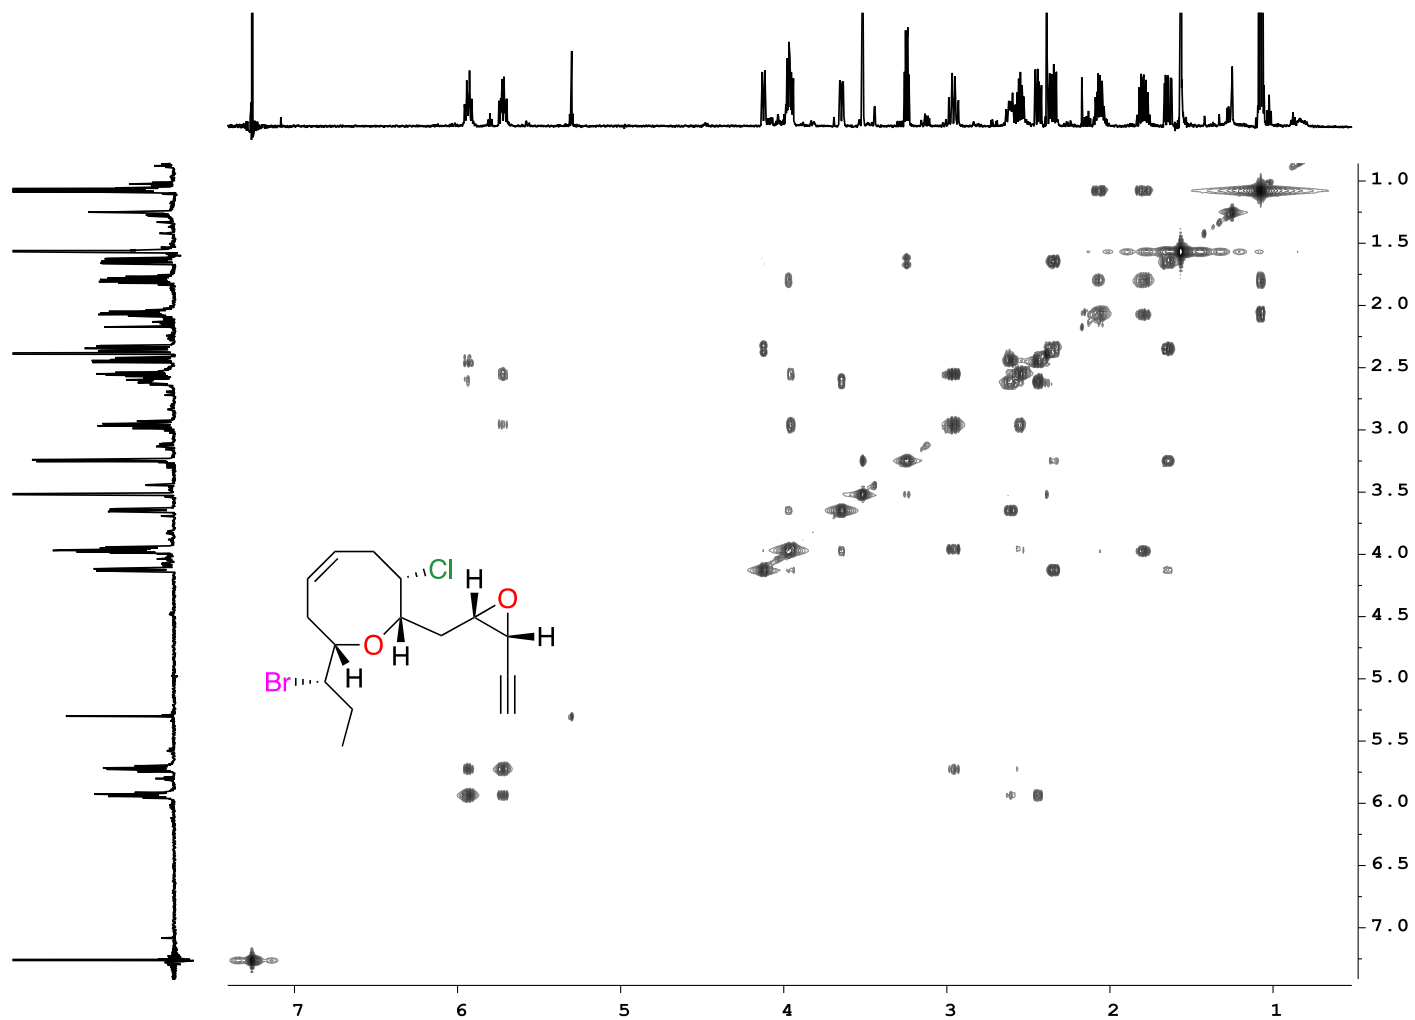

Figure S4. HSQCed spectrum (600 MHz, CDCl<sub>3</sub>) for (3*R*,4*S*)-epoxy-pinnatifidenyne **3**.

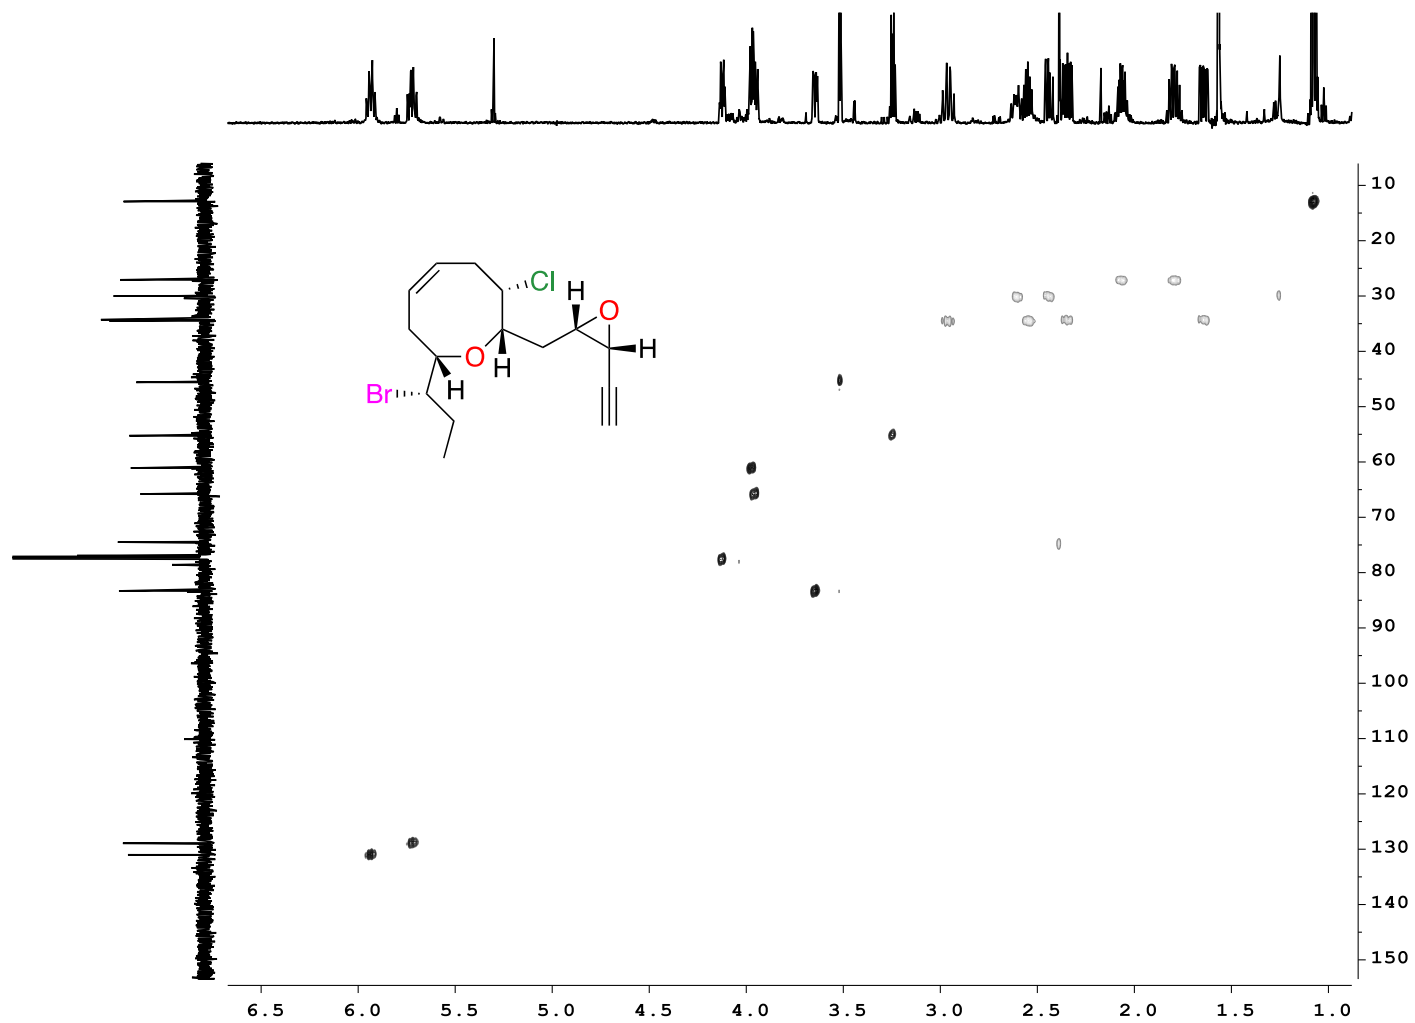



Figure S5. HMBC spectrum (600 MHz, CDCl<sub>3</sub>) for (3*R*,4*S*)-epoxy-pinnatifidenyne **3**.

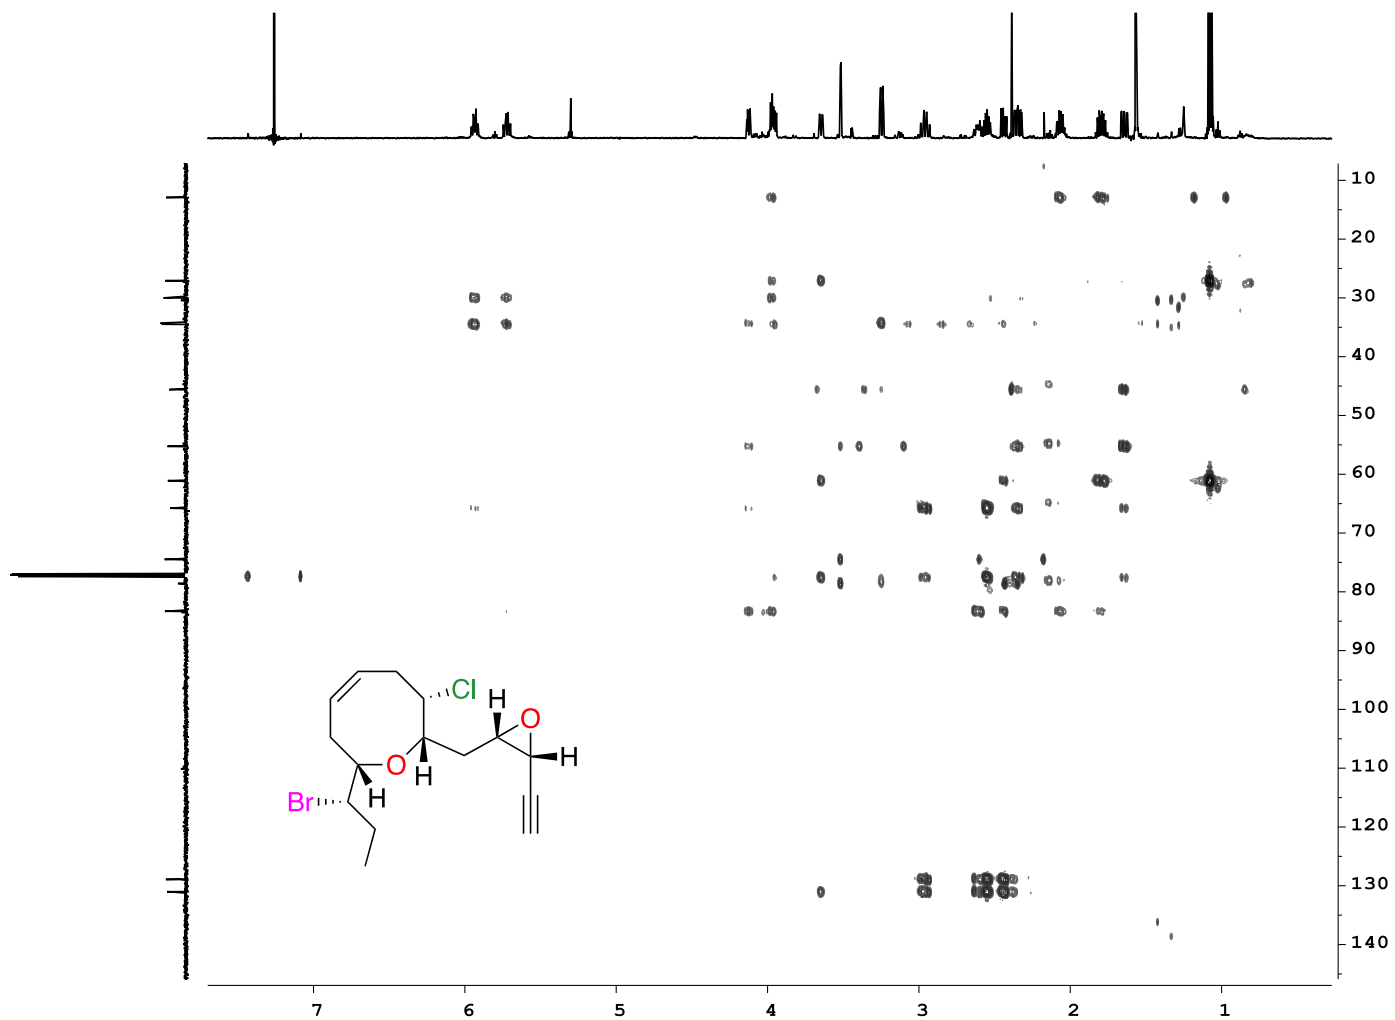

Figure S6. ROESY spectrum (600 MHz, CDCl<sub>3</sub>) for (3*R*,4*S*)-epoxy-pinnatifidenyne **3**.

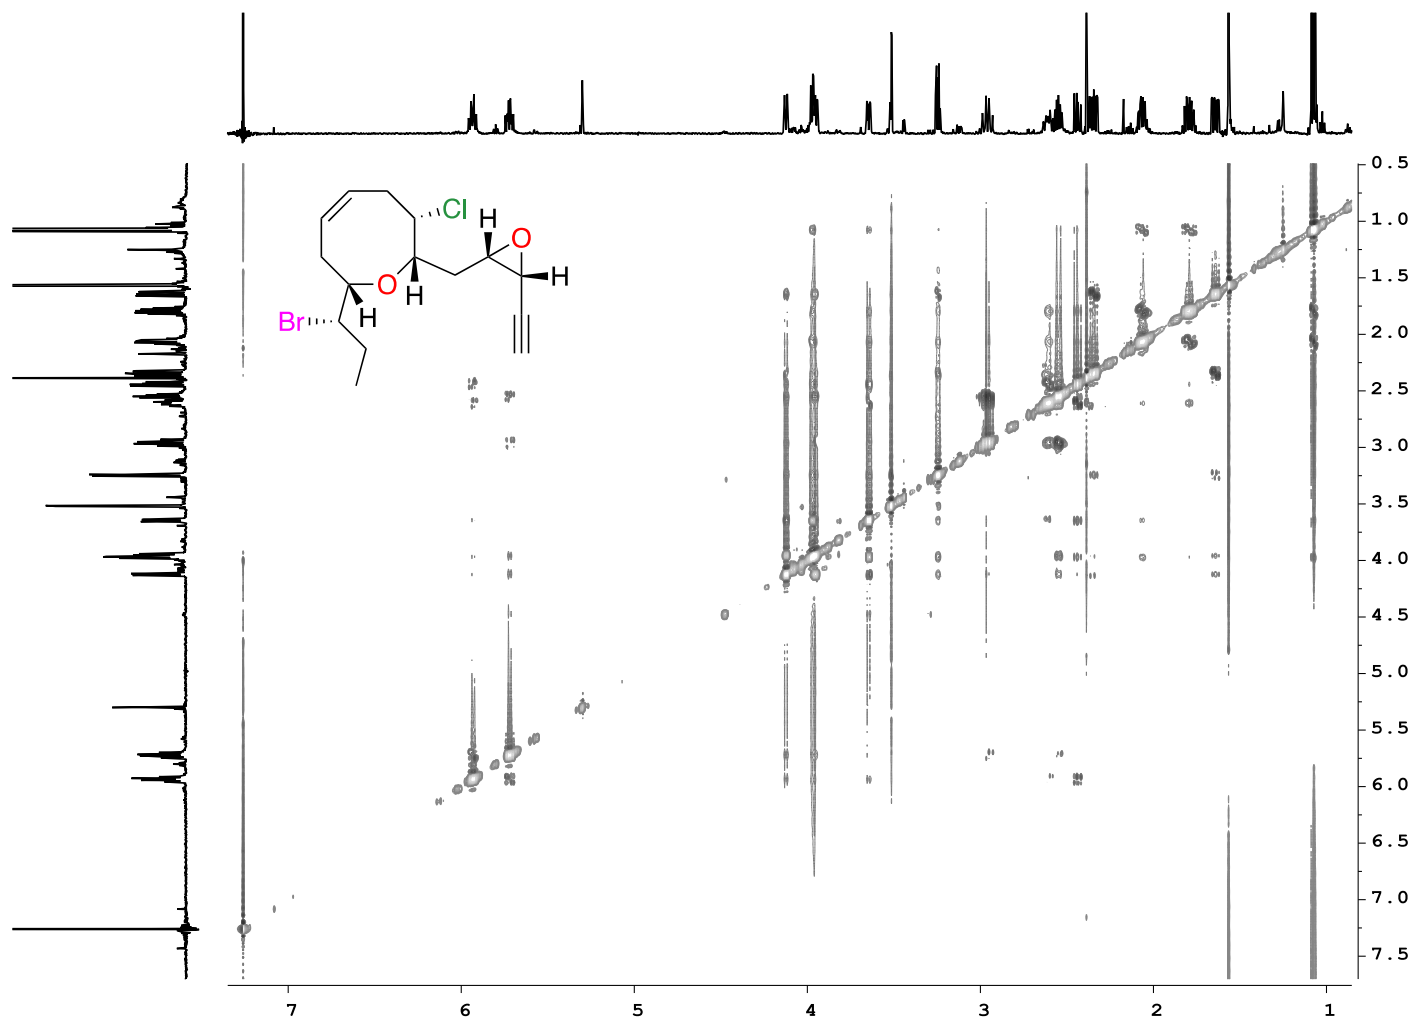

Figure S7. HSQC-HECADE spectrum (600 MHz, CDCl<sub>3</sub>) for (3*R*,4*S*)-epoxy-pinnatifidenyne **3**.

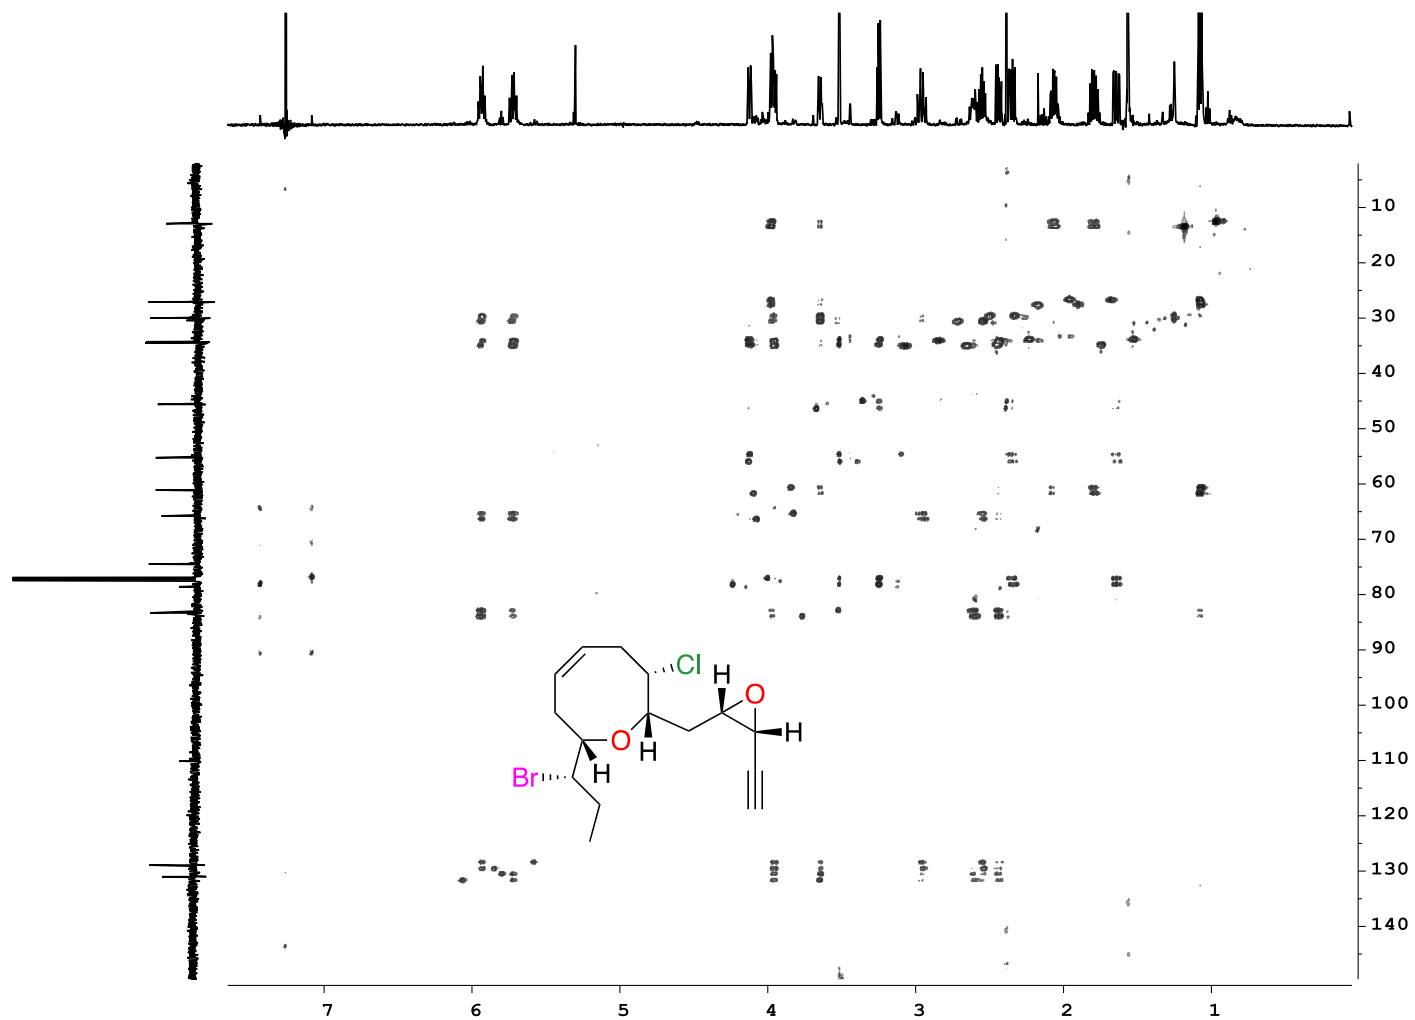

Figure S8. 1D NOESY spectra (600 MHz, CDCl<sub>3</sub>) for (3*R*,4*S*)-epoxy-pinnatifidenyne **3**.

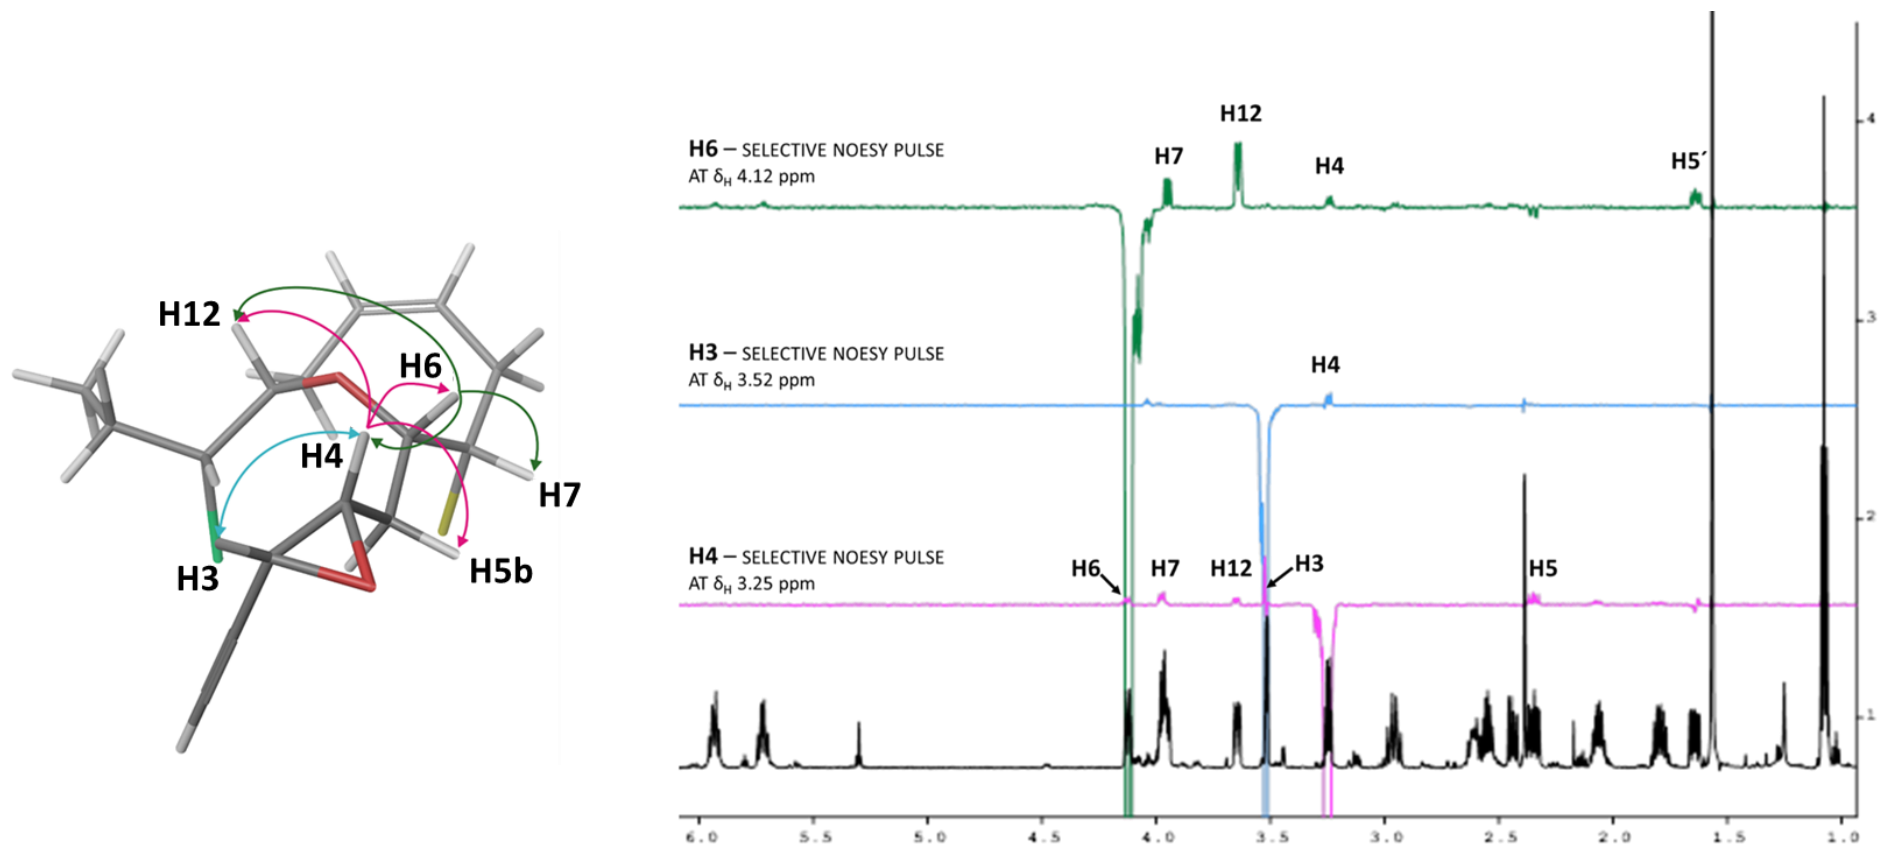

**Figure S9. HRESIMS spectrum for (3R,4S)-epoxy-pinnatifidenyne 3.**

**Elemental Composition Report**

**Multiple Mass Analysis: 2 mass(es) processed**

Tolerance = 5.0 PPM / DBE: min = -10.0, max = 1000.0

Element prediction: Off

Number of isotope peaks used for i-FIT = 2

Monoisotopic Mass, Even Electron Ions

1202 formula(e) evaluated with 14 results within limits (all results (up to 1000) for each mass)

Elements Used:

C: 0-60 H: 0-120 O: 0-3 Na: 0-1 35Cl: 0-1 37Cl: 0-1 79Br: 0-1 81Br: 0-1

ESI-319 Olivia M (Omf-E) 224 (9.777)

1: TOF MS ES+  
5.28e+003

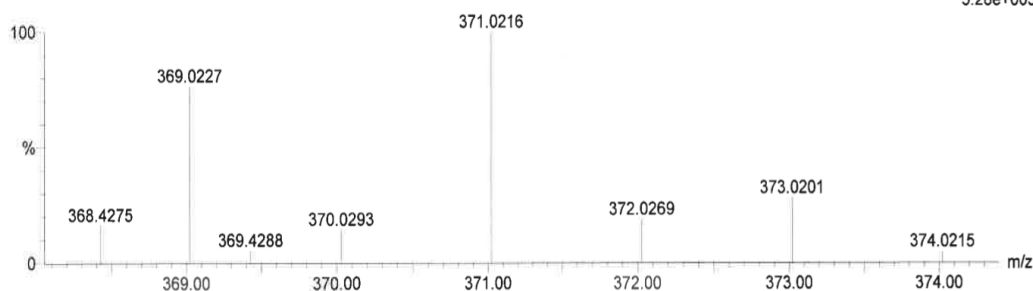

| Mass     | RA     | Calc. Mass | mDa  | PPM  | DBE  | i-FIT | Formula                      |
|----------|--------|------------|------|------|------|-------|------------------------------|
| 369.0227 | 76.50  | 369.0228   | -0.1 | -0.3 | -1.5 | 23.2  | C12 H26 O Na 79Br 81Br       |
|          |        | 369.0230   | -0.3 | -0.8 | -7.5 | 86.9  | C8 H30 O3 35Cl 79Br 81Br     |
|          |        | 369.0233   | -0.6 | -1.6 | 4.5  | 2.4   | C15 H20 O2 Na 35Cl 79Br      |
|          |        | 369.0234   | -0.7 | -1.9 | 5.5  | 0.3   | C16 H20 O Na 37Cl 81Br       |
|          |        | 369.0236   | -0.9 | -2.4 | -0.5 | 22.8  | C12 H24 O3 35Cl 37Cl 81Br    |
|          |        | 369.0239   | -1.2 | -3.3 | 11.5 | 7.0   | C19 H14 O2 Na 35Cl 37Cl      |
|          |        | 369.0212   | 1.5  | 4.1  | -3.5 | 50.2  | C10 H25 O3 Na 35Cl 37Cl 81Br |
| 371.0216 | 100.00 | 371.0212   | 0.4  | 1.1  | 4.5  | 3.3   | C15 H20 O2 Na 35Cl 81Br      |
|          |        | 371.0208   | 0.8  | 2.2  | 18.5 | 68.7  | C24 H11 35Cl 37Cl            |
|          |        | 371.0227   | -1.1 | -3.0 | 7.5  | 0.6   | C17 H19 O2 37Cl 79Br         |
|          |        | 371.0203   | 1.3  | 3.5  | 4.5  | 3.5   | C15 H20 O2 Na 37Cl 79Br      |
|          |        | 371.0202   | 1.4  | 3.8  | 11.5 | 16.8  | C20 H17 35Cl 79Br            |
|          |        | 371.0200   | 1.6  | 4.3  | -7.5 | 114.8 | C8 H30 O3 37Cl 79Br 81Br     |
|          |        | 371.0234   | -1.8 | -4.9 | 13.5 | 26.7  | C21 H15 Na 81Br              |

Figure S10. <sup>1</sup>H-NMR spectrum (600 MHz, CDCl<sub>3</sub>) for (3*S*,4*R*)-epoxy-pinnatifidenyne 4.

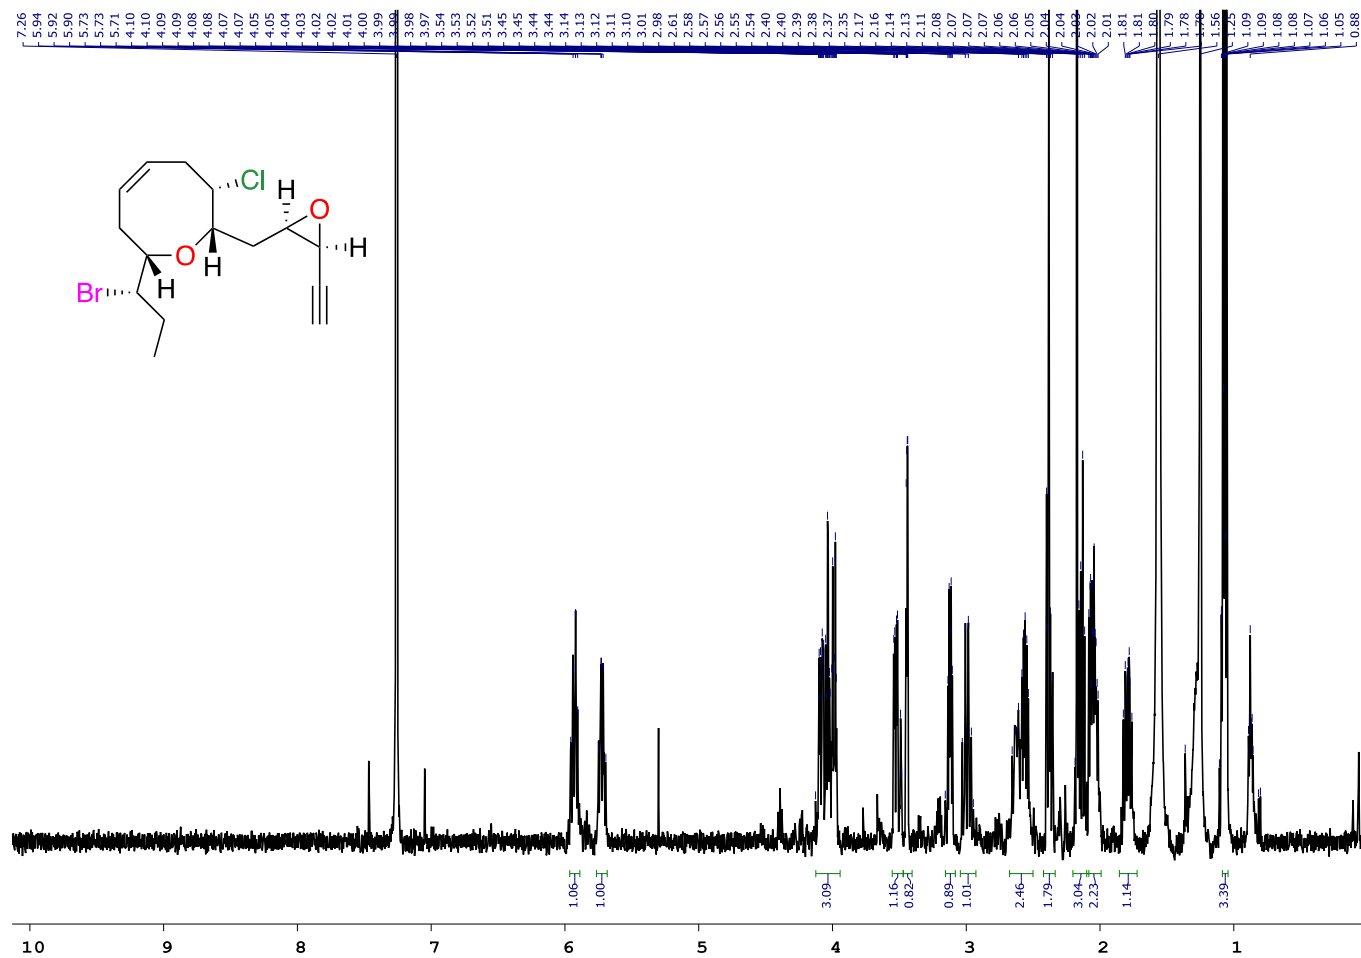

Figure S11.  $^{13}\text{C}$ -NMR spectrum (150 MHz,  $\text{CDCl}_3$ ) for (3*S*,4*R*)-epoxy-pinnatifidenyne **4**.

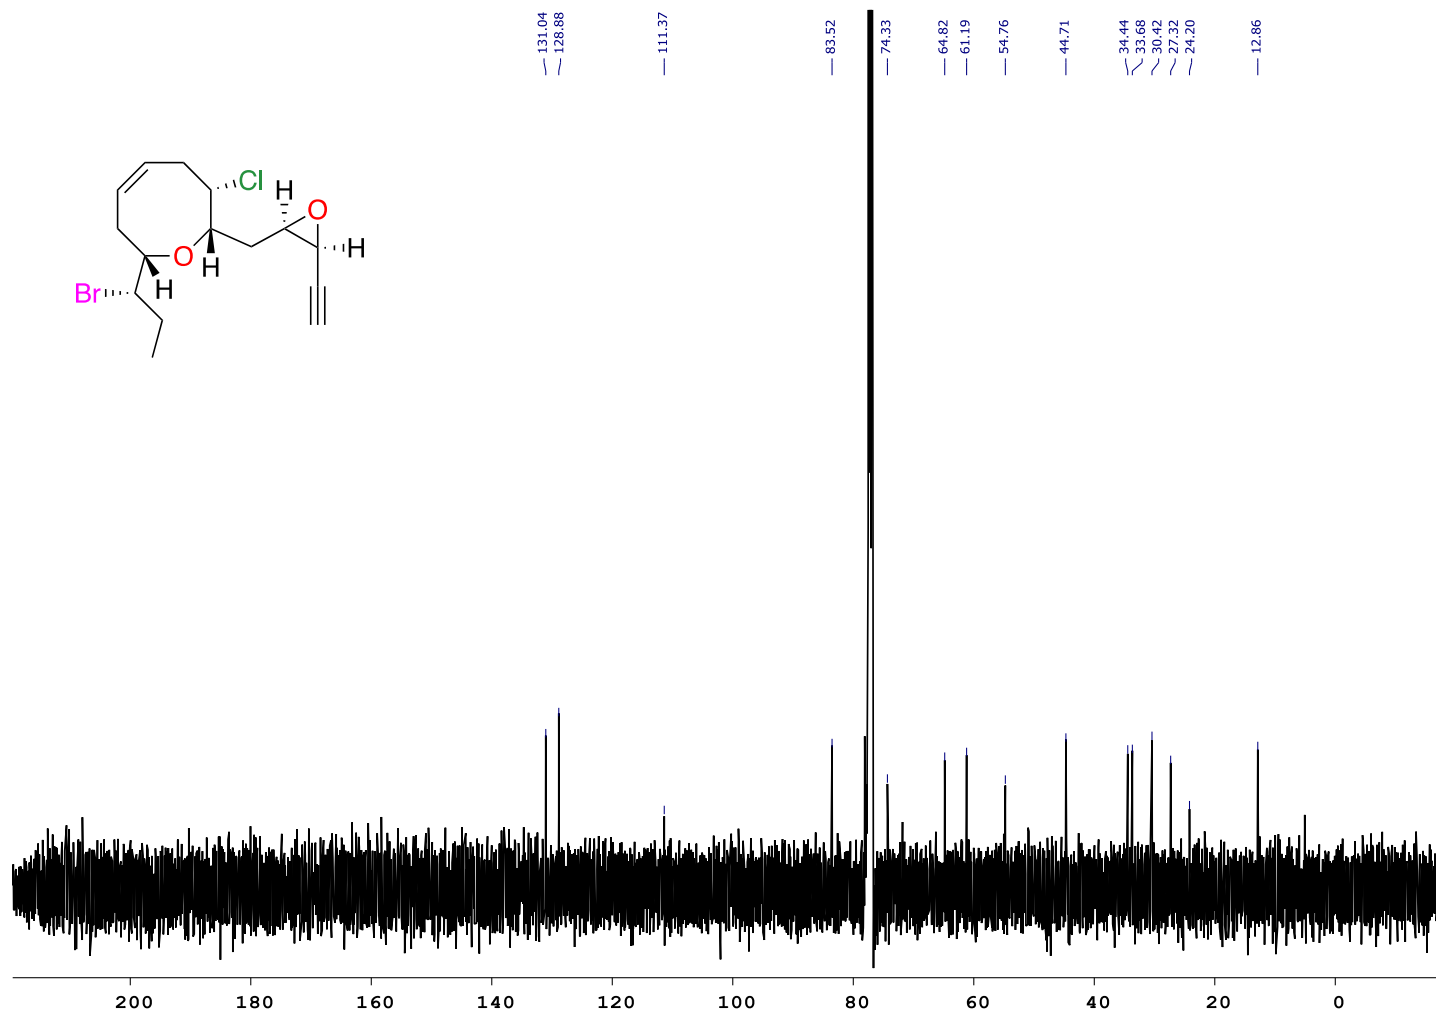

Figure S12. HSQCed spectrum (600 MHz, CDCl<sub>3</sub>) for (3*S*,4*R*)-epoxy-pinnatifidenyne **4**.

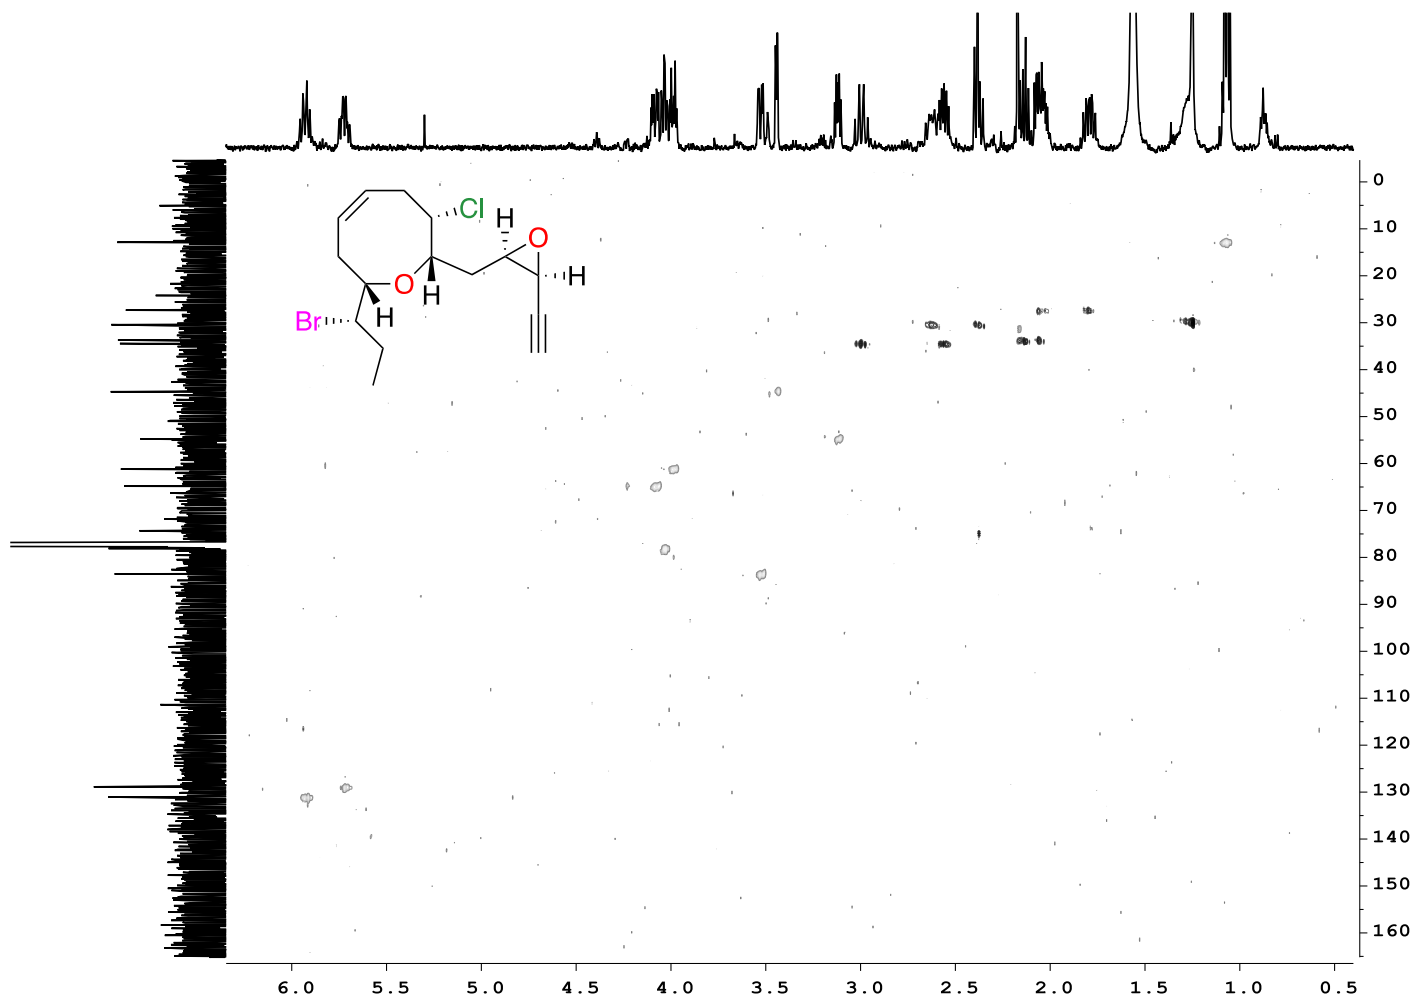



Figure S13. COSY  $^1\text{H}$ - $^1\text{H}$  spectrum (600 MHz,  $\text{CDCl}_3$ ) for (3*S*,4*R*)-epoxy-pinnatifidenyne **4**.

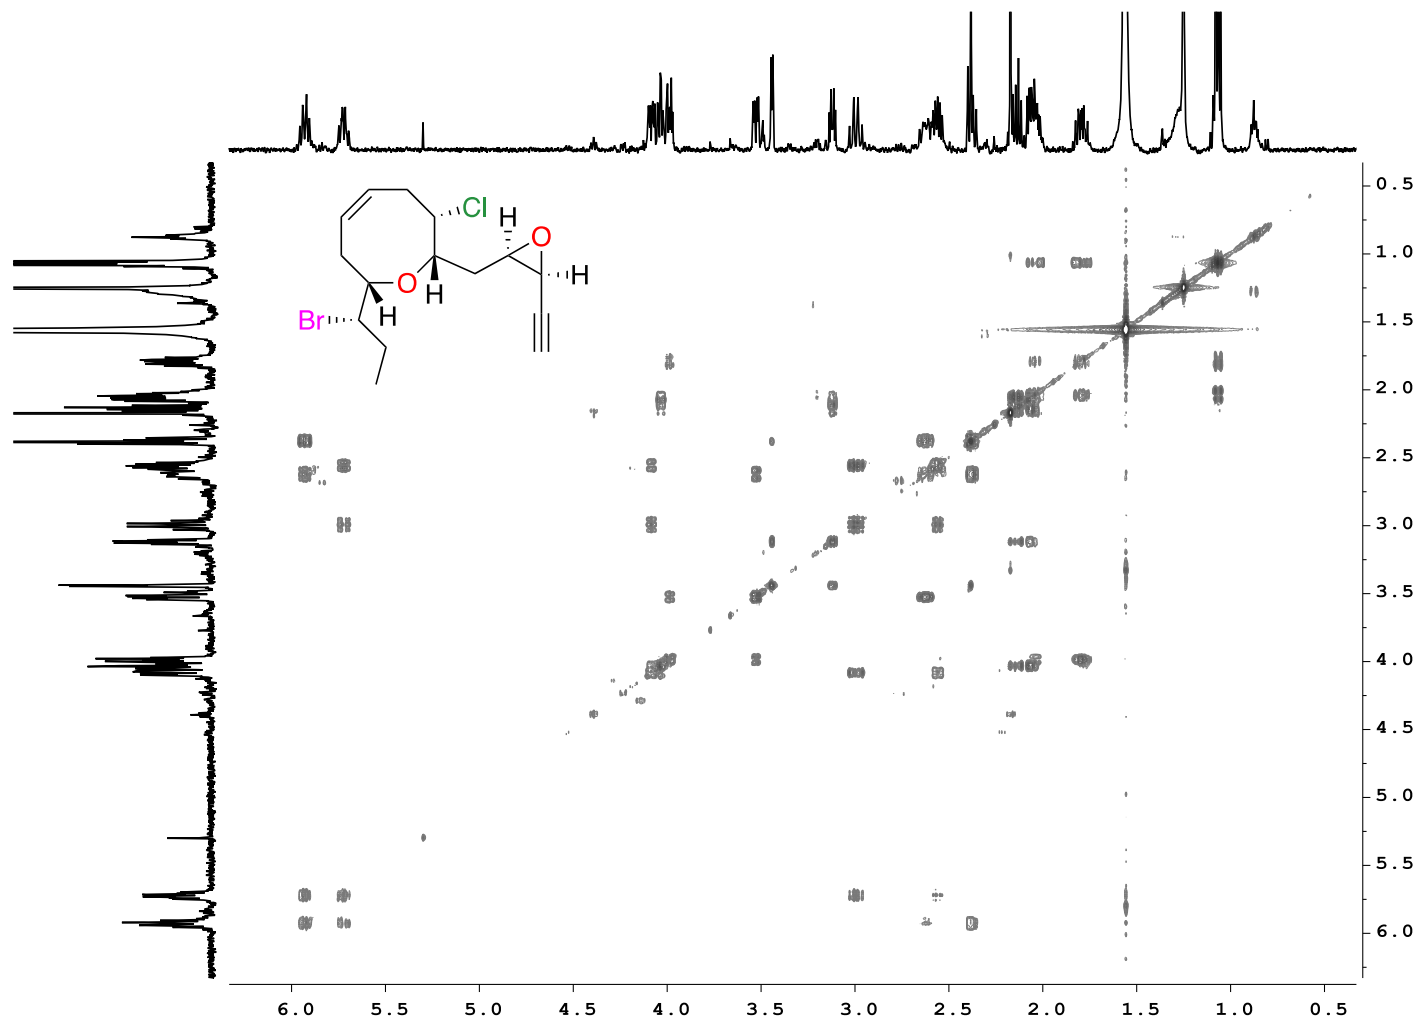

Figure S14. HMBC spectrum (600 MHz, CDCl<sub>3</sub>) for (3*S*,4*R*)-epoxy-pinnatifidenyne **4**.

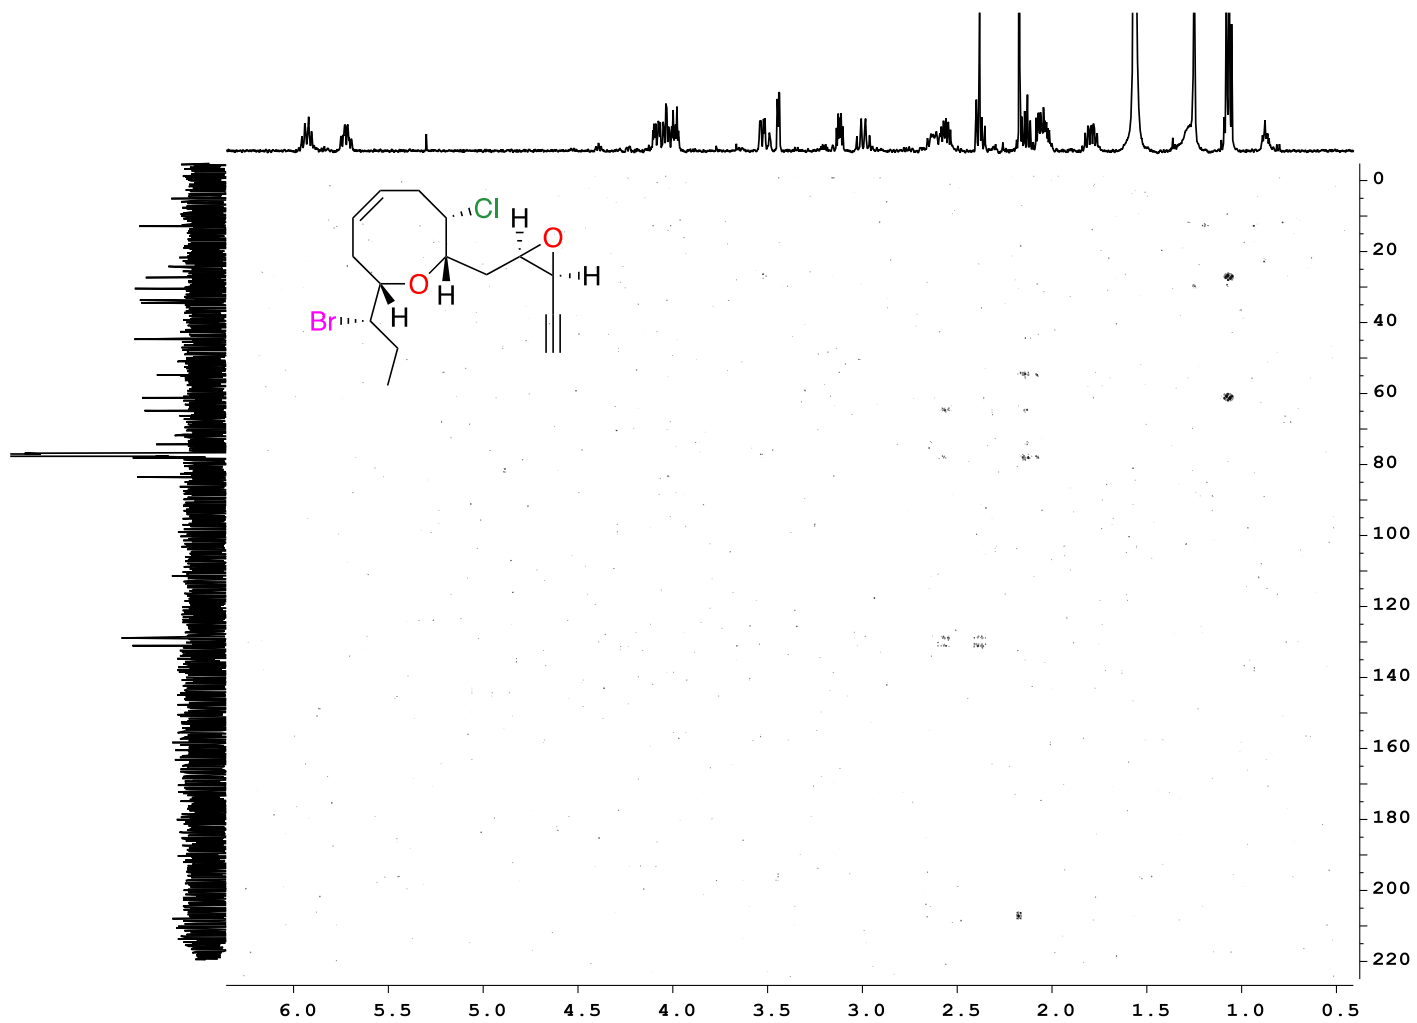

Figure S15. ROESY spectrum (600 MHz, CDCl<sub>3</sub>) for (3*S*,4*R*)-epoxy-pinnatifidenyne **4**.

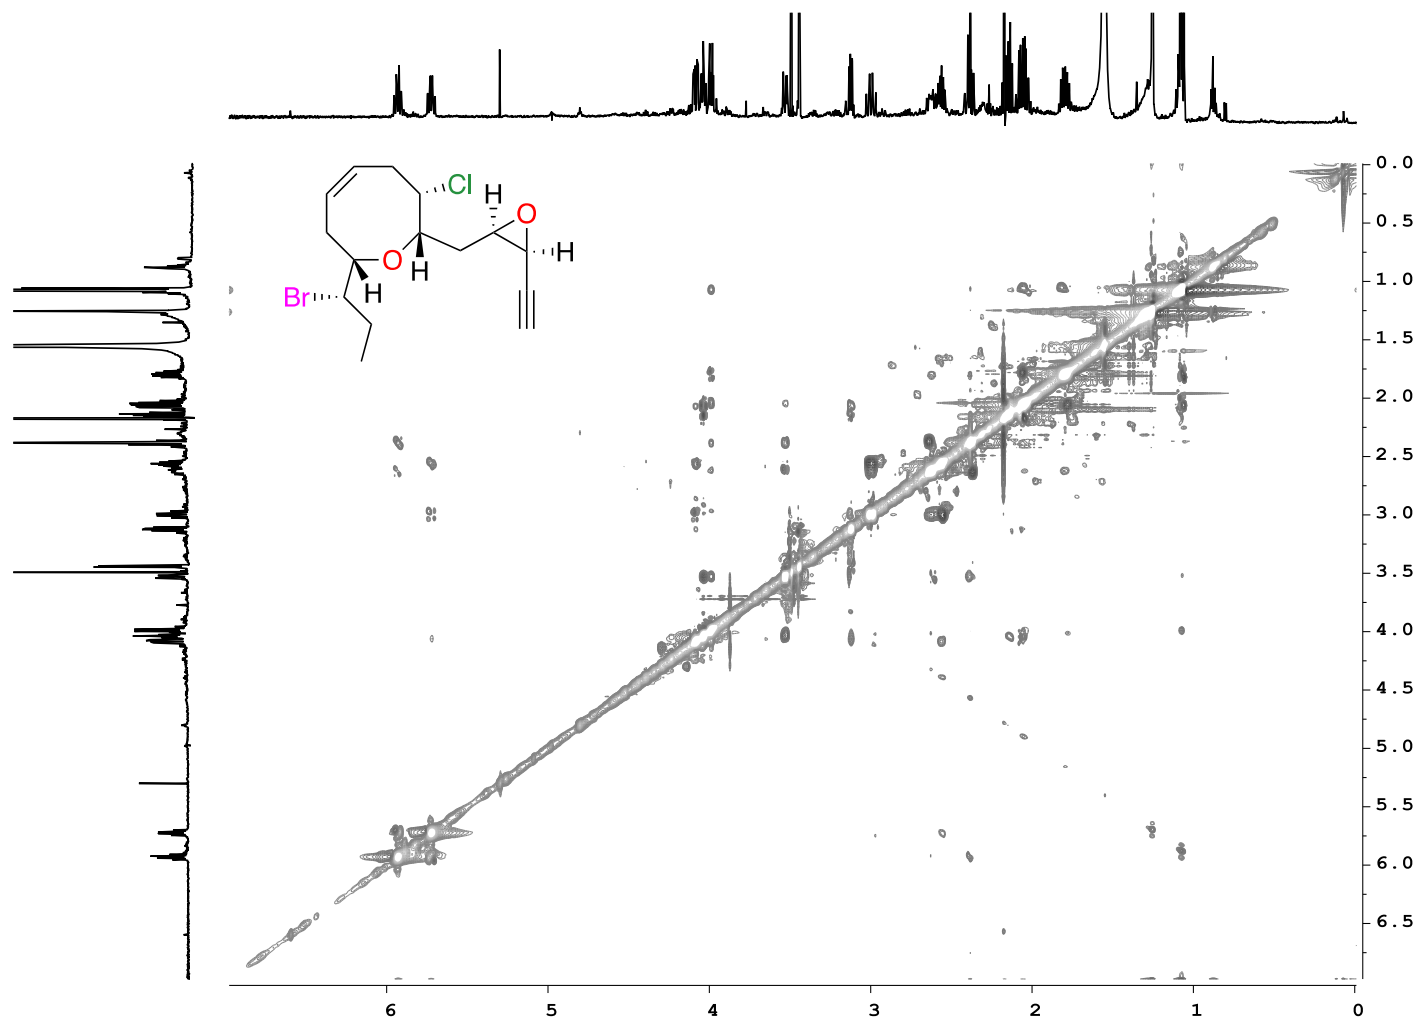

Figure S16. 1D NOESY spectra (600 MHz, CDCl<sub>3</sub>) for (3*S*,4*R*)-epoxy-pinnatifidenyne **4**.

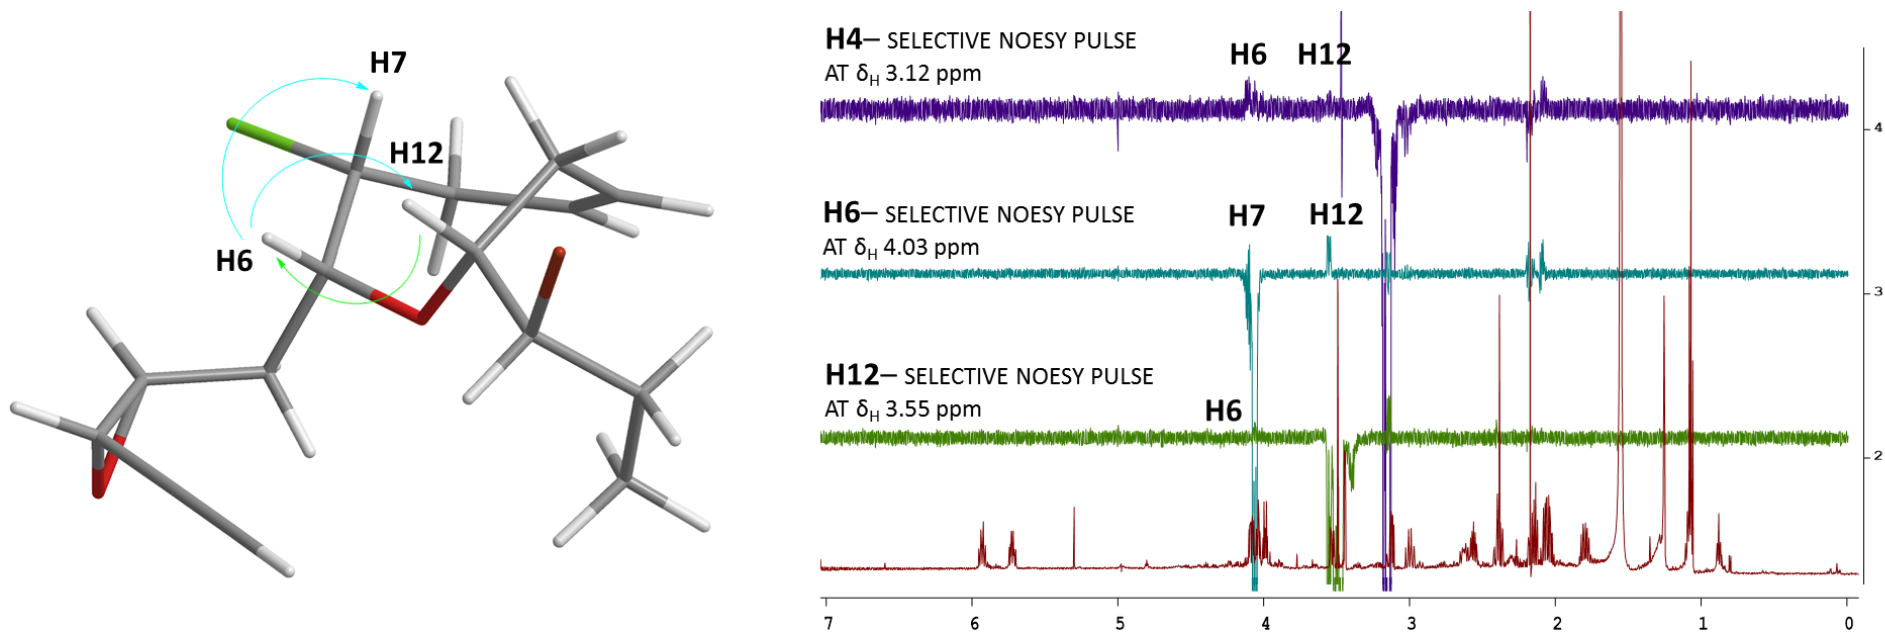

**Figure S17.** HRESIMS spectrum for (3*S*,4*R*)-epoxy-pinnatifidenyne **4**.

**Elemental Composition Report**

**Multiple Mass Analysis: 4 mass(es) processed**

Tolerance = 5.0 PPM / DBE: min = -10.0, max = 1000.0

Element prediction: Off

Number of isotope peaks used for i-FIT = 2

Monoisotopic Mass, Even Electron Ions

625 formula(e) evaluated with 11 results within limits (all results (up to 1000) for each mass)

Elements Used:

C: 0-20 H: 0-25 O: 0-2 Na: 0-1 35Cl: 0-1 37Cl: 0-1 79Br: 0-1 81Br: 0-1

(ESI 17-784) Adrian M (AM Epoxido B) 34 (1.487)

1: TOF MS ES+  
6.73e+003

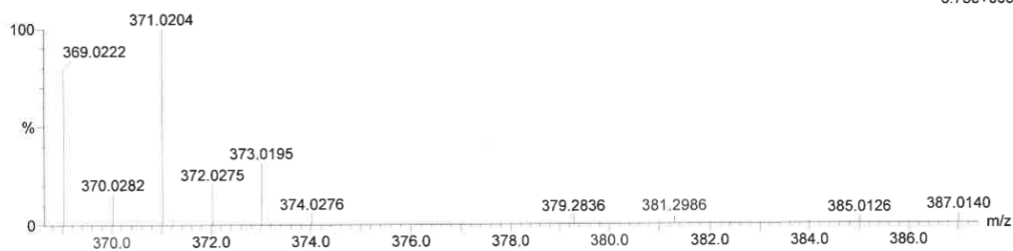

| Mass     | RA     | Calc. Mass | mDa  | PPM  | DBE  | i-FIT | Formula                 |
|----------|--------|------------|------|------|------|-------|-------------------------|
| 369.0222 | 79.43  | 369.0233   | -1.1 | -3.0 | 4.5  | 8.4   | C15 H20 O2 Na 35Cl 79Br |
|          |        | 369.0234   | -1.2 | -3.3 | 5.5  | 3.0   | C16 H20 O Na 37Cl 81Br  |
|          |        | 369.0239   | -1.7 | -4.6 | 11.5 | 3.6   | C19 H14 O2 Na 35Cl 37Cl |
| 371.0204 | 100.00 | 371.0203   | 0.1  | 0.3  | 4.5  | 18.3  | C15 H20 O2 Na 37Cl 79Br |
|          |        | 371.0202   | 0.2  | 0.5  | 11.5 | 5.2   | C20 H17 35Cl 79Br       |
|          |        | 371.0212   | -0.8 | -2.2 | 4.5  | 18.2  | C15 H20 O2 Na 35Cl 81Br |
| 372.0275 | 20.59  | ---        |      |      |      |       |                         |
| 373.0195 | 31.36  | 373.0201   | -0.6 | -1.6 | 0.5  | 4.2   | C13 H25 O2 79Br 81Br    |
|          |        | 373.0204   | -0.9 | -2.4 | 12.5 | 11.0  | C20 H15 O Na 79Br       |
|          |        | 373.0183   | 1.2  | 3.2  | 4.5  | 0.5   | C15 H20 O2 Na 37Cl 81Br |
|          |        | 373.0207   | -1.2 | -3.2 | 7.5  | 1.4   | C17 H19 O2 37Cl 81Br    |
|          |        | 373.0182   | 1.3  | 3.5  | 11.5 | 11.2  | C20 H17 35Cl 81Br       |

Figure S18. <sup>1</sup>H-NMR spectrum (600 MHz, CDCl<sub>3</sub>) for (9*R*,10*S*)-epoxy-*Z*-pinnatifidenyne 5.

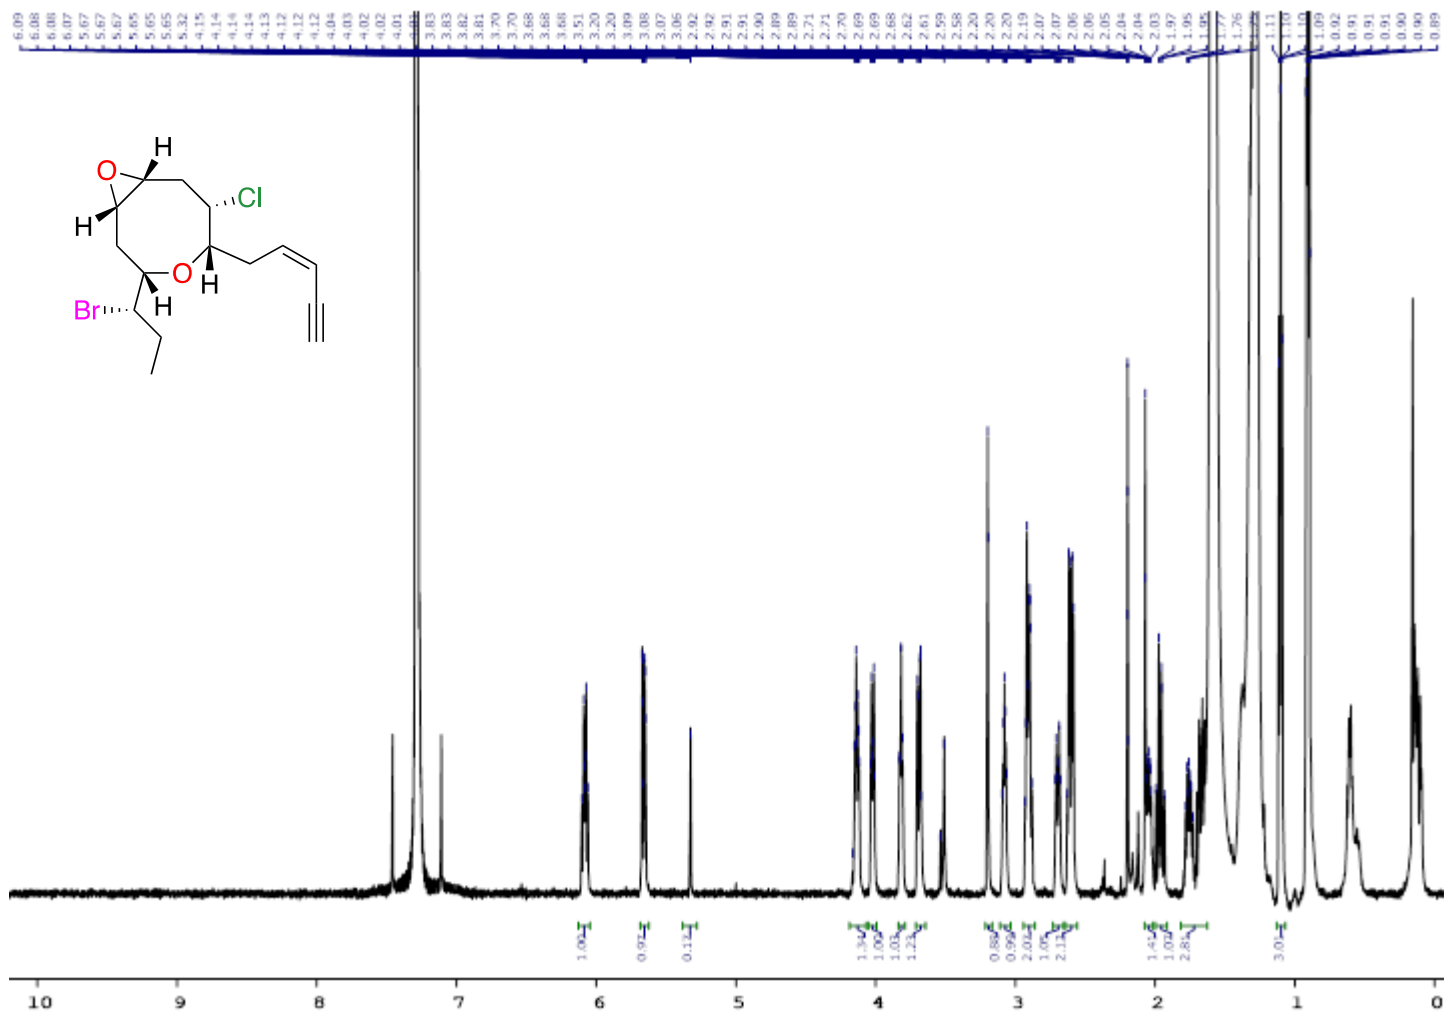

Figure S19. HSQCed spectrum (600 MHz, CDCl<sub>3</sub>) for (9*R*,10*S*)-epoxy-*Z*-pinnatifidenyne 5.

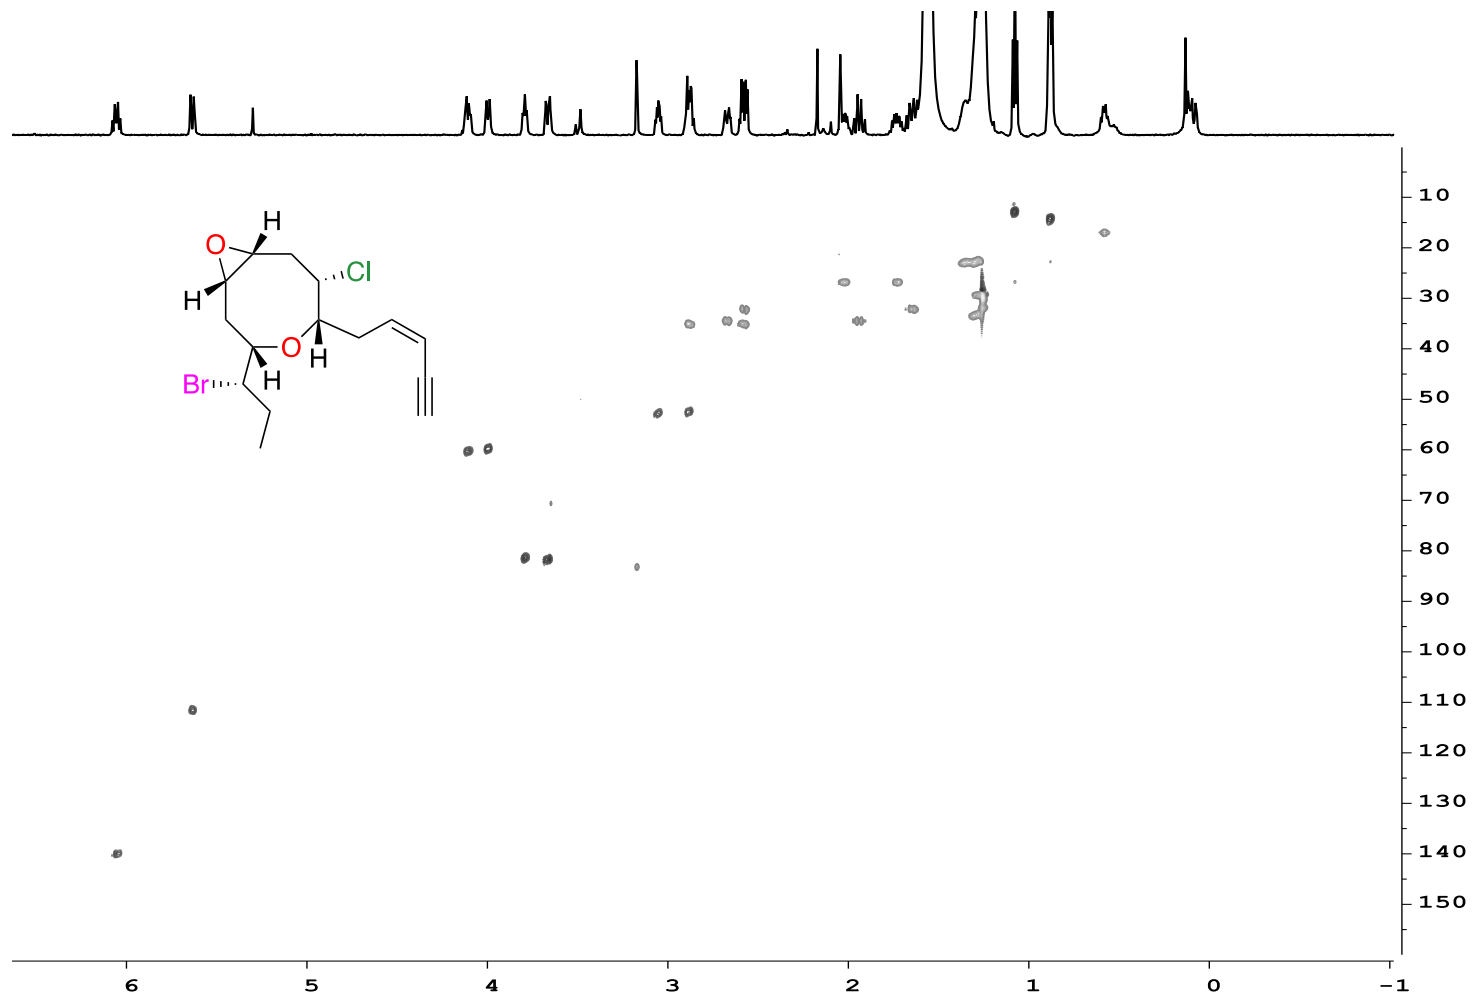

Figure S20. COSY  $^1\text{H}$ - $^1\text{H}$  spectrum (600 MHz,  $\text{CDCl}_3$ ) for (9*R*,10*S*)-epoxy-*Z*-pinnatifidenyne 5.

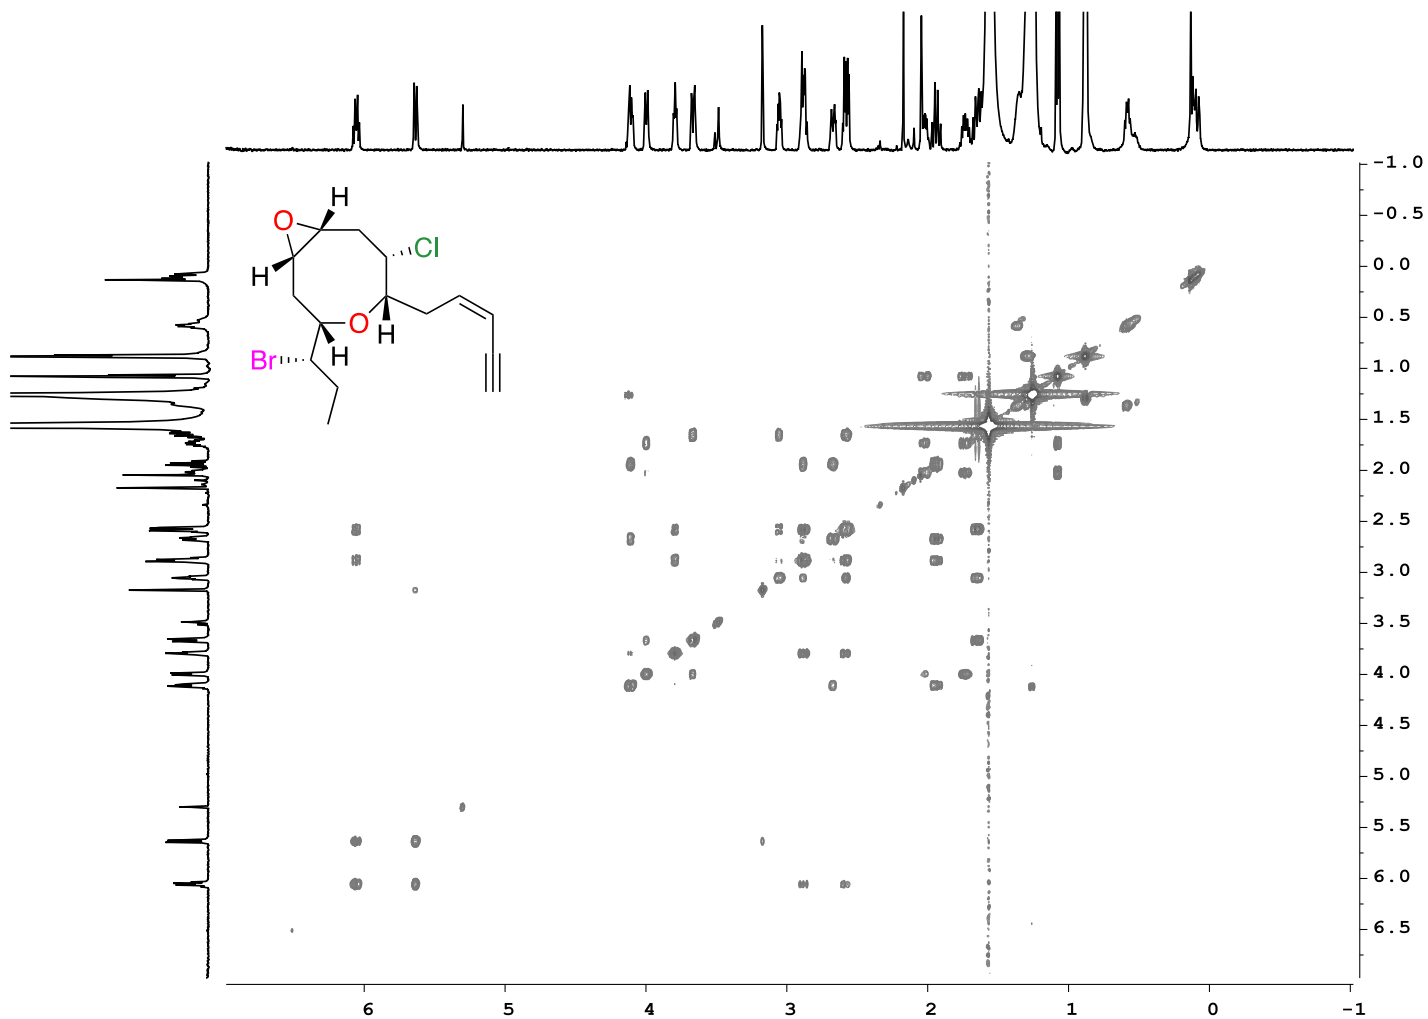



Figure S21. HMBC spectrum (600 MHz, CDCl<sub>3</sub>) for (9*R*,10*S*)-epoxy-*Z*-pinnatifidenyne 5.

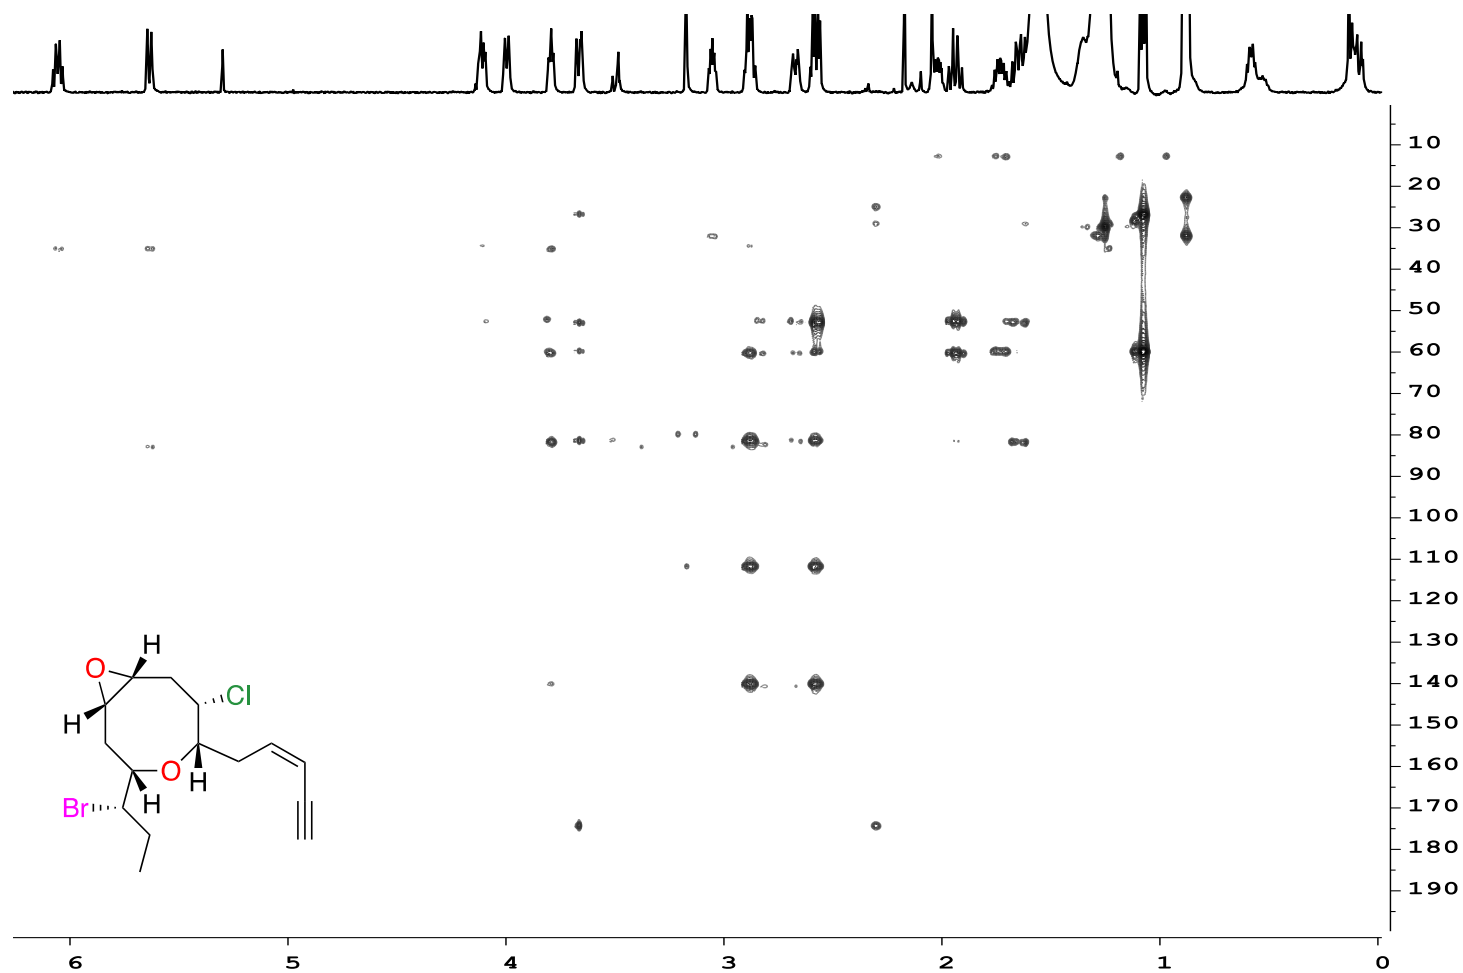

Figure S22. ROESY spectrum (600 MHz, CDCl<sub>3</sub>) for (9*R*,10*S*)-epoxy-*Z*-pinnatifidenyne **5**.

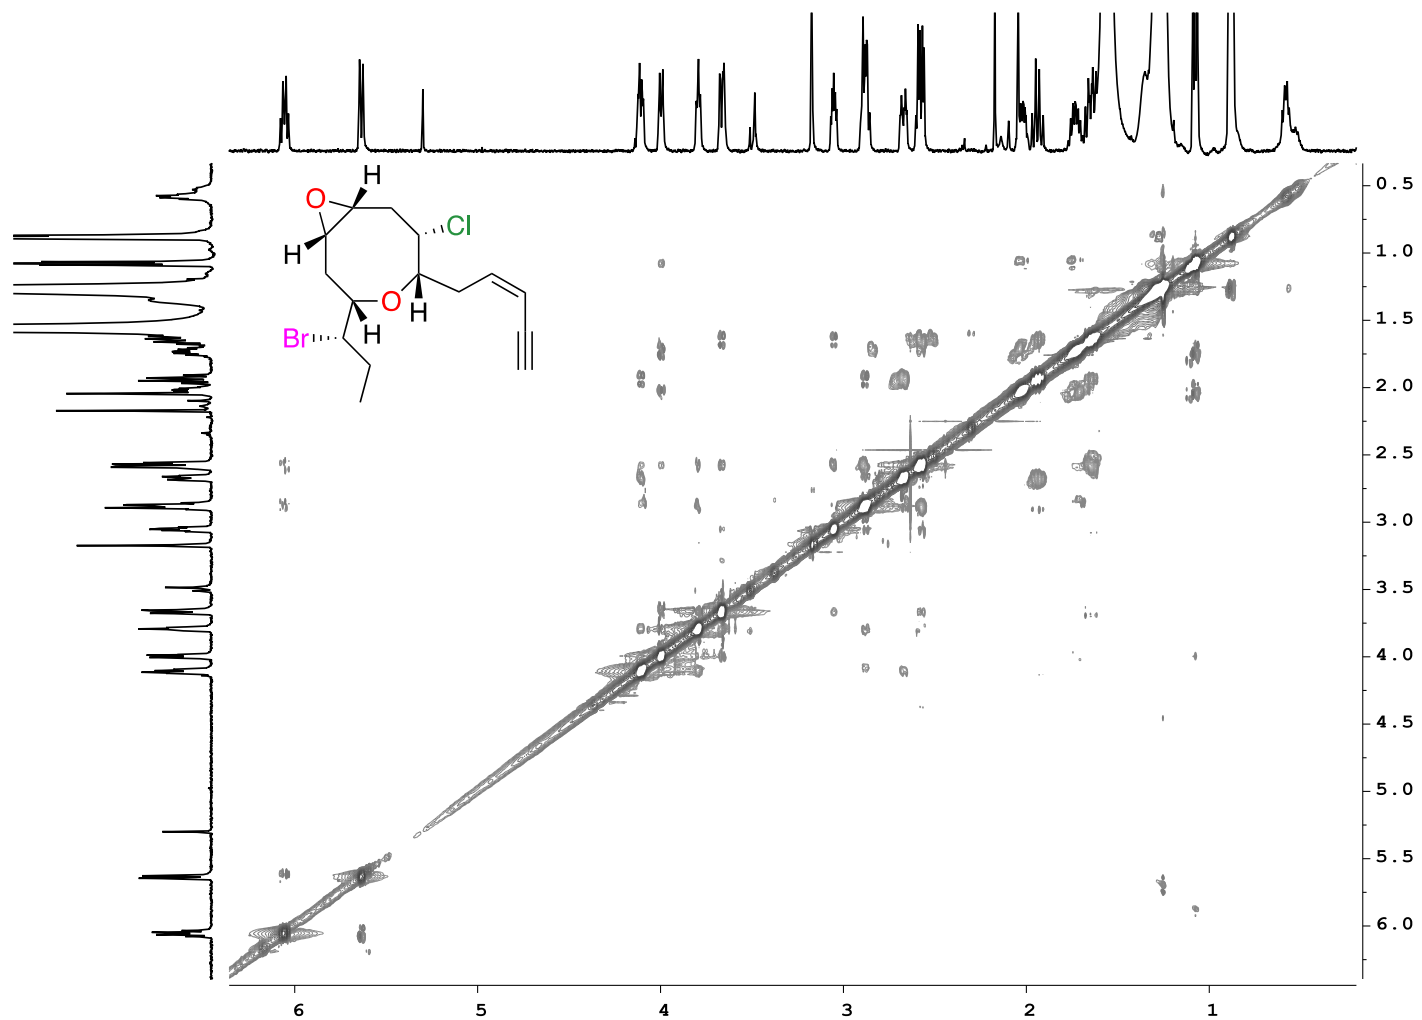

Figure S23. 1D NOESY spectra (600 MHz, CDCl<sub>3</sub>) for (9*R*,10*S*)-epoxy-*Z*-pinnatifidenyne 5.

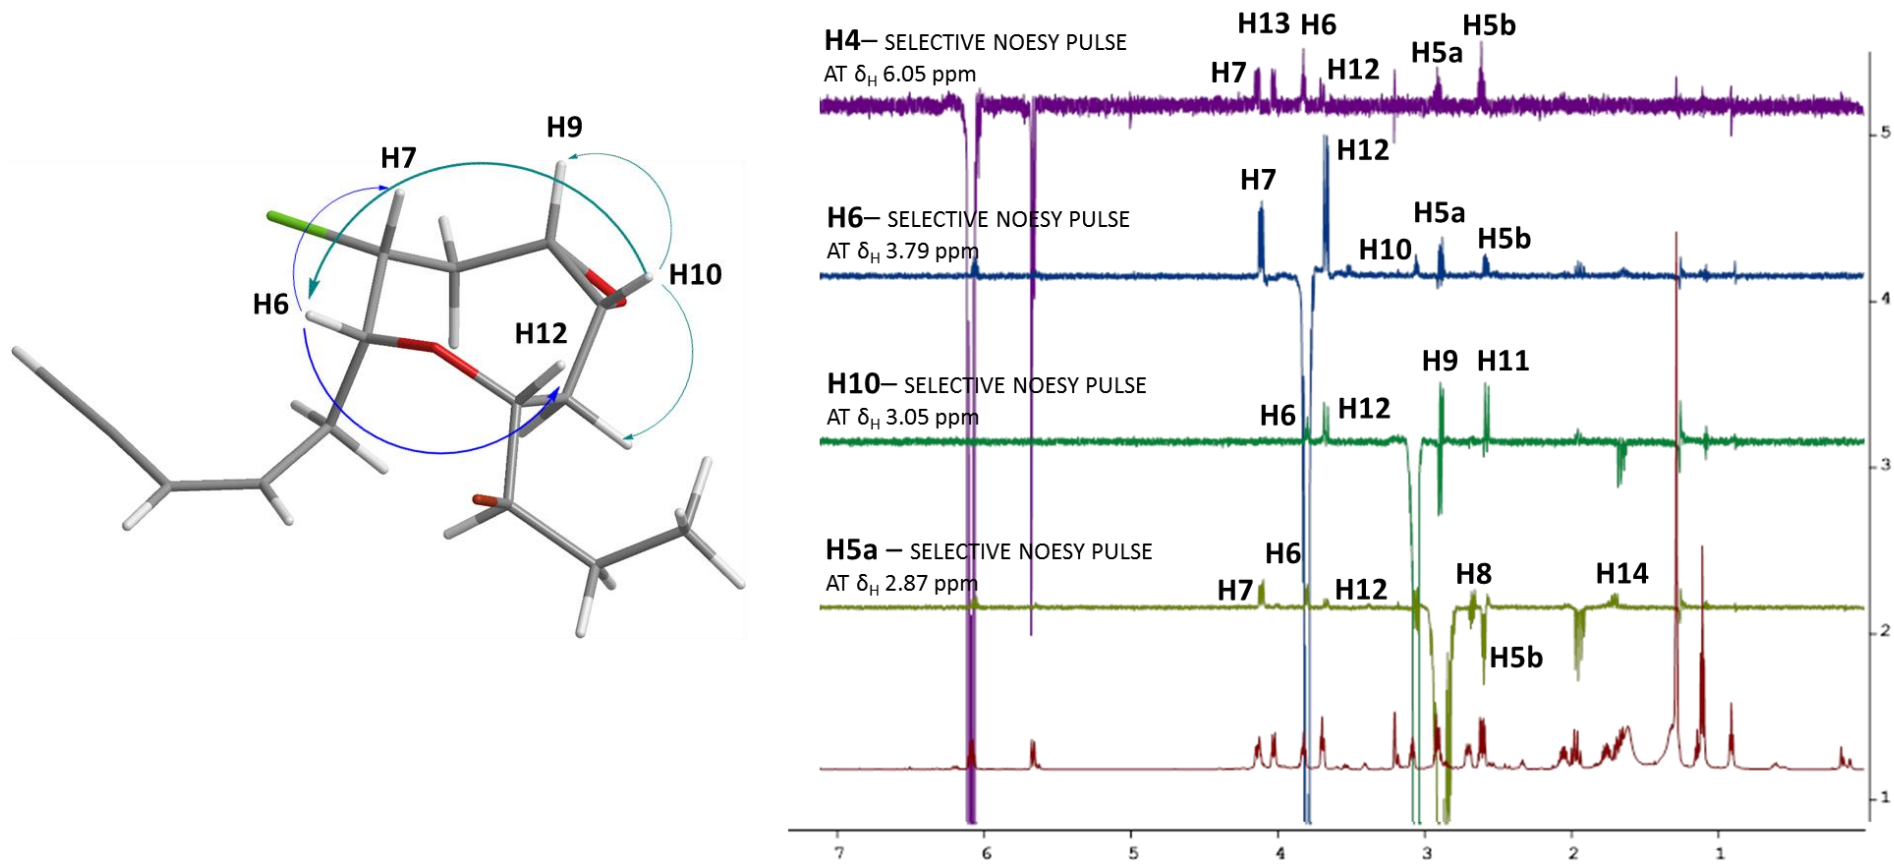

Figure S24. HRESIMS spectrum for (9R,10S)-epoxy-Z-pinnatifidenyne 5.

Elemental Composition Report

Page

Multiple Mass Analysis: 3 mass(es) processed

Tolerance = 5.0 PPM / DBE: min = -10.0, max = 1000.0

Element prediction: Off

Number of isotope peaks used for i-FIT = 2

Monoisotopic Mass, Even Electron Ions

469 formula(e) evaluated with 12 results within limits (all results (up to 1000) for each mass)

Elements Used:

C: 0-20 H: 0-25 O: 0-2 Na: 0-1 35Cl: 0-1 37Cl: 0-1 79Br: 0-1 81Br: 0-1

(ESI 17-783) Adrian M (AM EpoxidoC) 7 (0.296)

1: TOF MS ES+  
4.41e+002

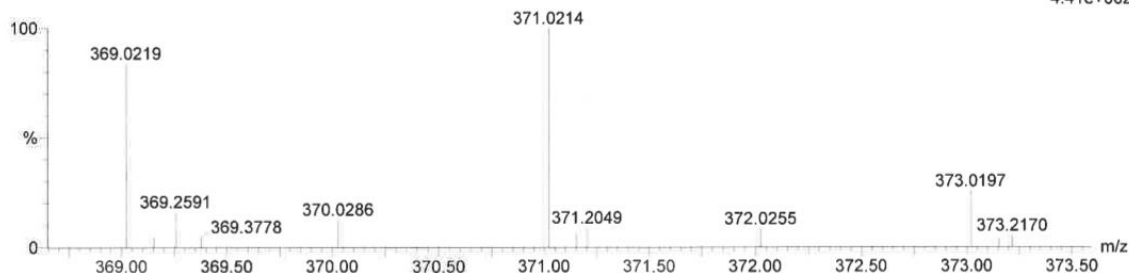

Minimum: 20.00  
Maximum: 100.00

| Mass     | RA     | Calc. Mass | mDa  | PPM  | DBE  | i-FIT | Formula                  |
|----------|--------|------------|------|------|------|-------|--------------------------|
| 369.0219 | 83.92  | 369.0233   | -1.4 | -3.8 | 4.5  | 0.5   | C15 H20 O2 Na 35Cl 79Br  |
|          |        | 369.0234   | -1.5 | -4.1 | 5.5  | 1.0   | C16 H20 O Na 37Cl 81Br   |
|          |        | 369.0202   | 1.7  | 4.6  | 3.5  | 0.5   | C15 H22 O 35Cl 37Cl 79Br |
| 371.0214 | 100.00 | 371.0212   | 0.2  | 0.5  | 4.5  | 14.7  | C15 H20 O2 Na 35Cl 81Br  |
|          |        | 371.0203   | 1.1  | 3.0  | 4.5  | 14.7  | C15 H20 O2 Na 37Cl 79Br  |
|          |        | 371.0202   | 1.2  | 3.2  | 11.5 | 32.7  | C20 H17 35Cl 79Br        |
|          |        | 371.0227   | -1.3 | -3.5 | 7.5  | 21.7  | C17 H19 O2 37Cl 79Br     |
| 373.0197 | 25.40  | 373.0201   | -0.4 | -1.1 | 0.5  | n/a   | C13 H25 O2 79Br 81Br     |
|          |        | 373.0204   | -0.7 | -1.9 | 12.5 | n/a   | C20 H15 O Na 79Br        |
|          |        | 373.0207   | -1.0 | -2.7 | 7.5  | n/a   | C17 H19 O2 37Cl 81Br     |
|          |        | 373.0183   | 1.4  | 3.8  | 4.5  | n/a   | C15 H20 O2 Na 37Cl 81Br  |
|          |        | 373.0182   | 1.5  | 4.0  | 11.5 | n/a   | C20 H17 35Cl 81Br        |

Figure S25. <sup>1</sup>H-NMR spectrum (600 MHz, CDCl<sub>3</sub>) for pinnatifidehyde **6**.

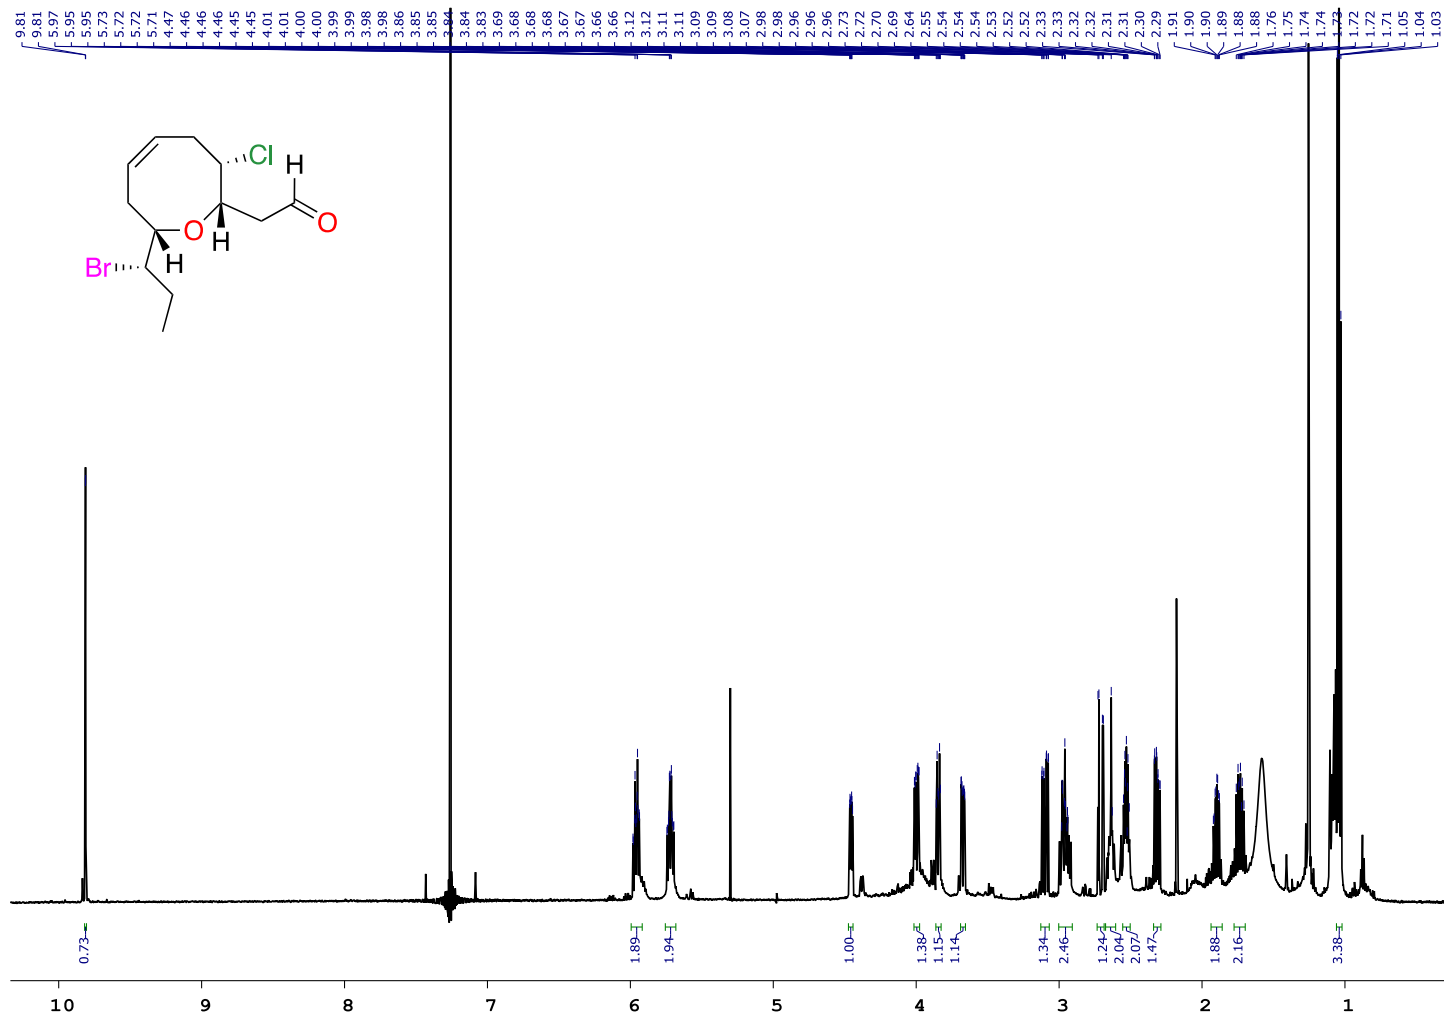

Figure S26.  $^{13}\text{C}$ -NMR spectrum (125 MHz,  $\text{CDCl}_3$ ) for pinnatifidehyde 6.

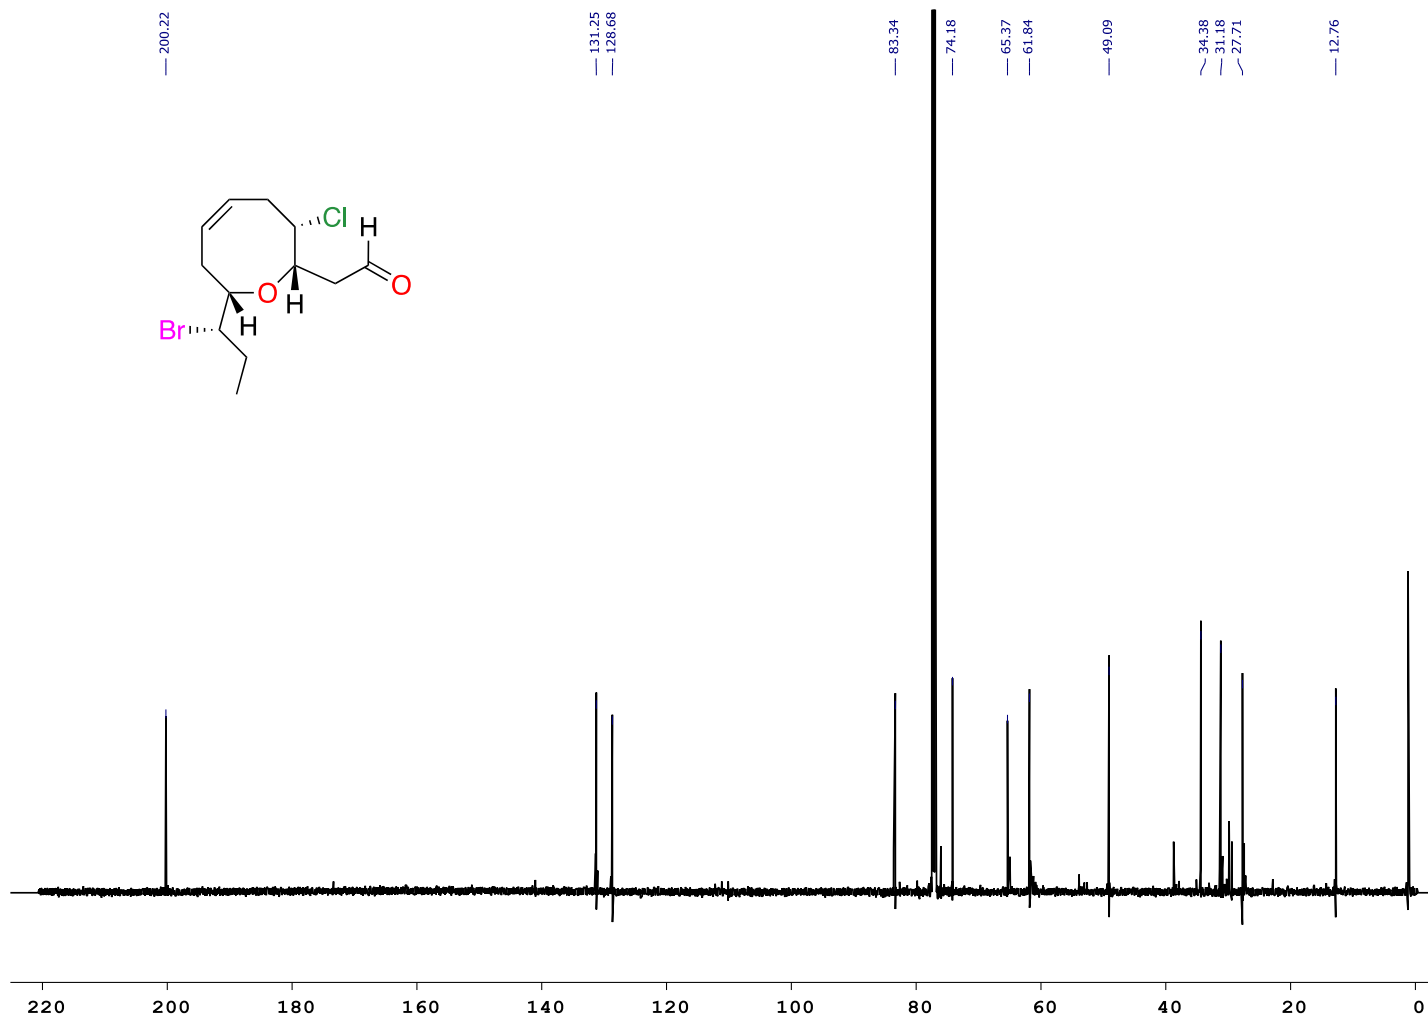

Figure S27. COSY  $^1\text{H}$ - $^1\text{H}$  spectrum (600 MHz,  $\text{CDCl}_3$ ) for pinnatifidehyde 6.

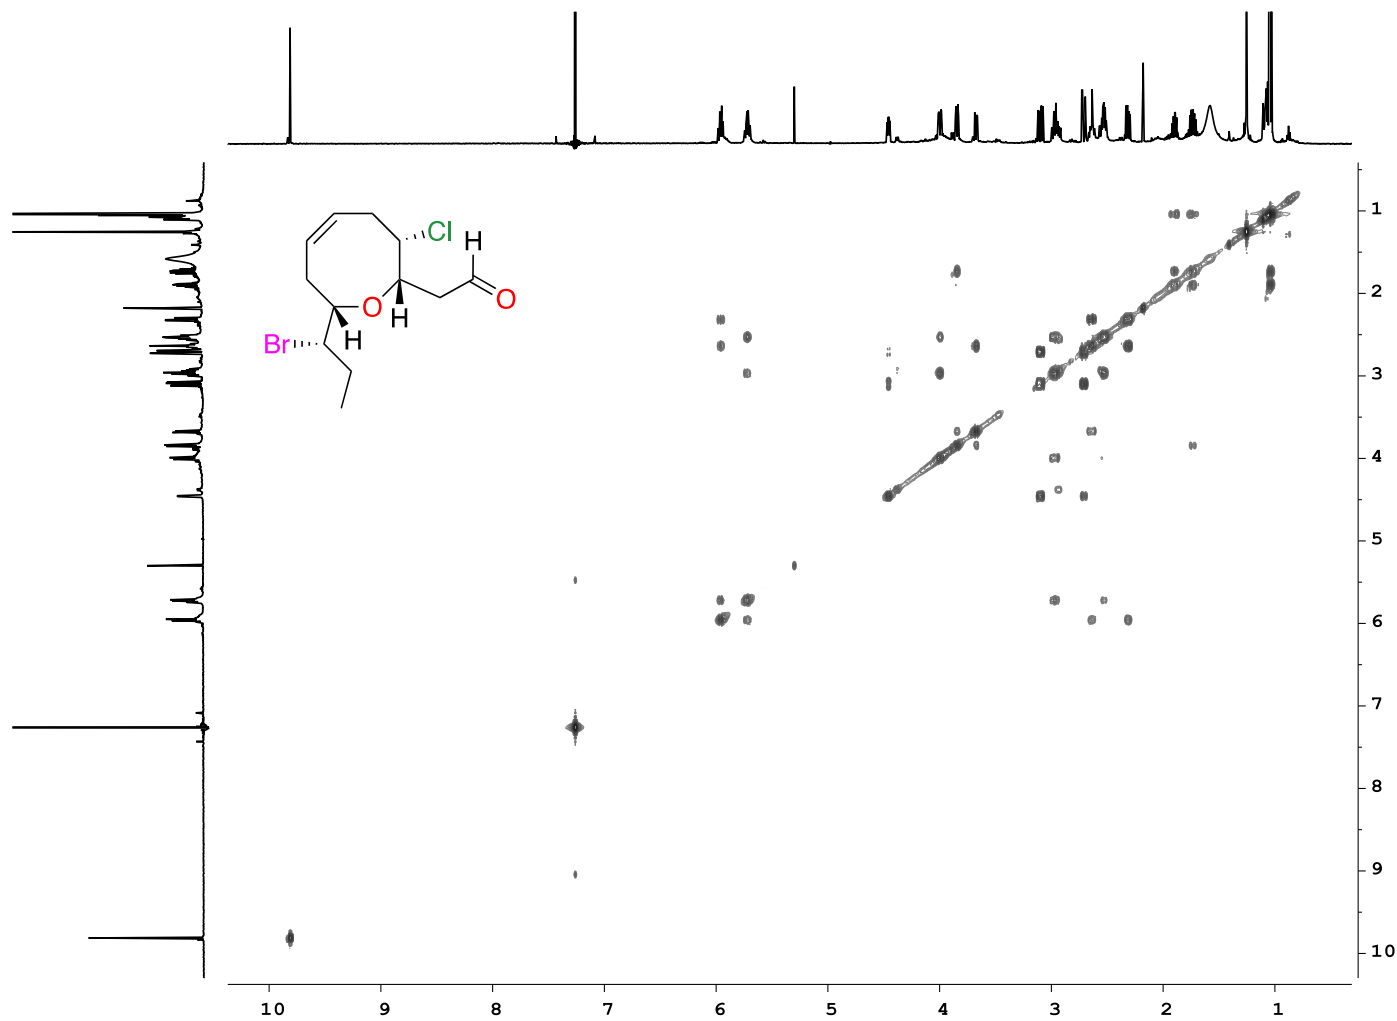

Figure S28. HSQC spectrum (600 MHz, CDCl<sub>3</sub>) for pinnatifidehyde 6.

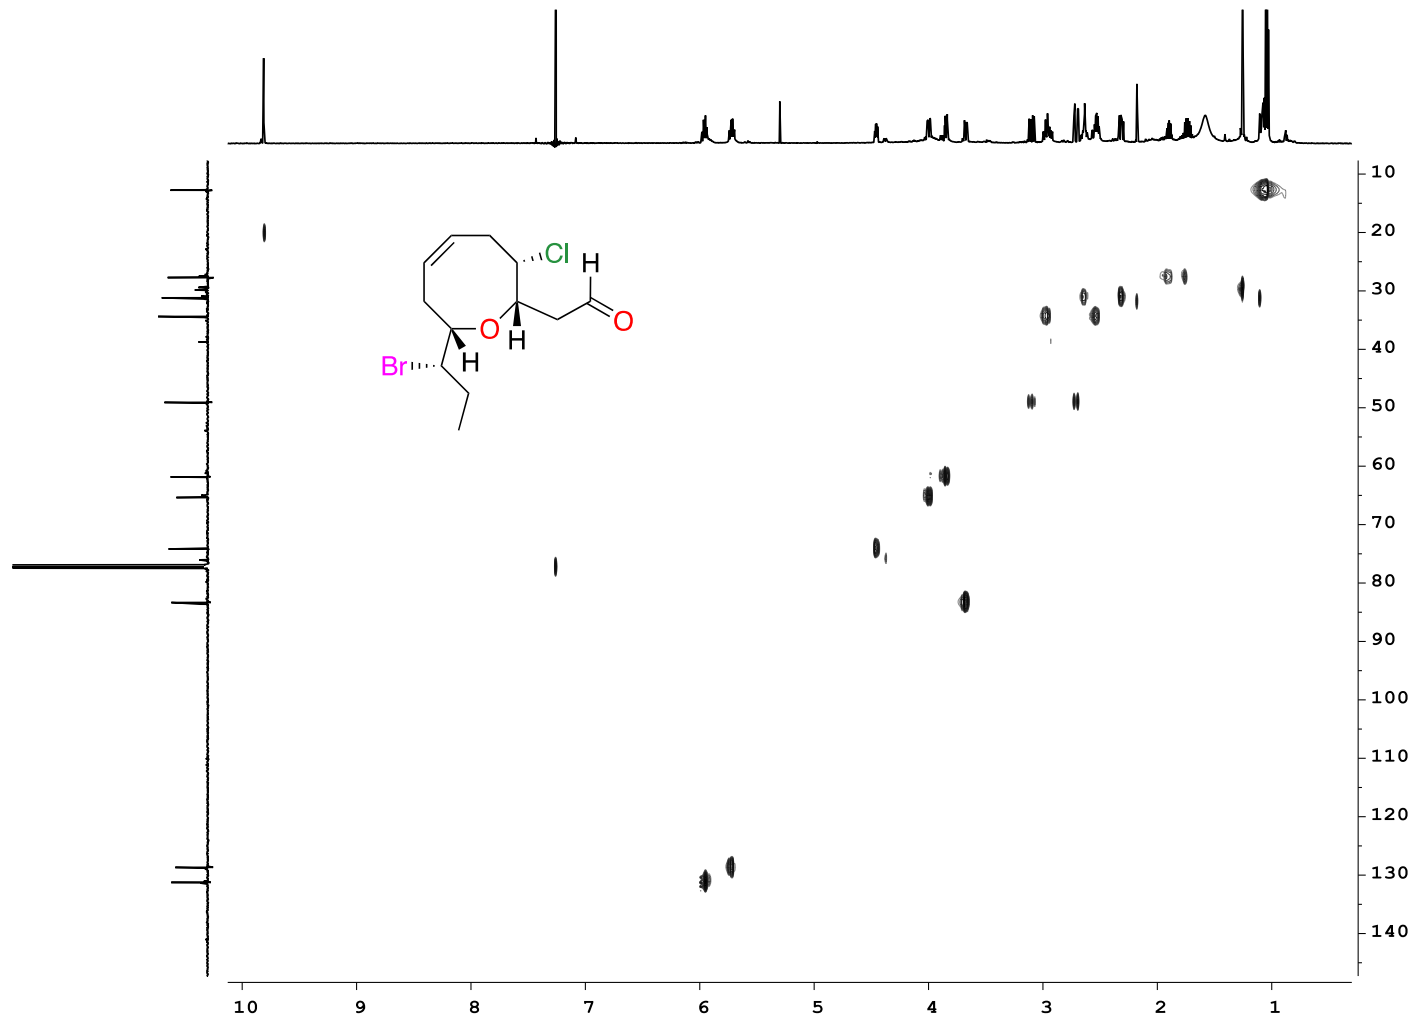



Figure S29. HMBC spectrum (600 MHz, CDCl<sub>3</sub>) for pinnatifidehyde 6.

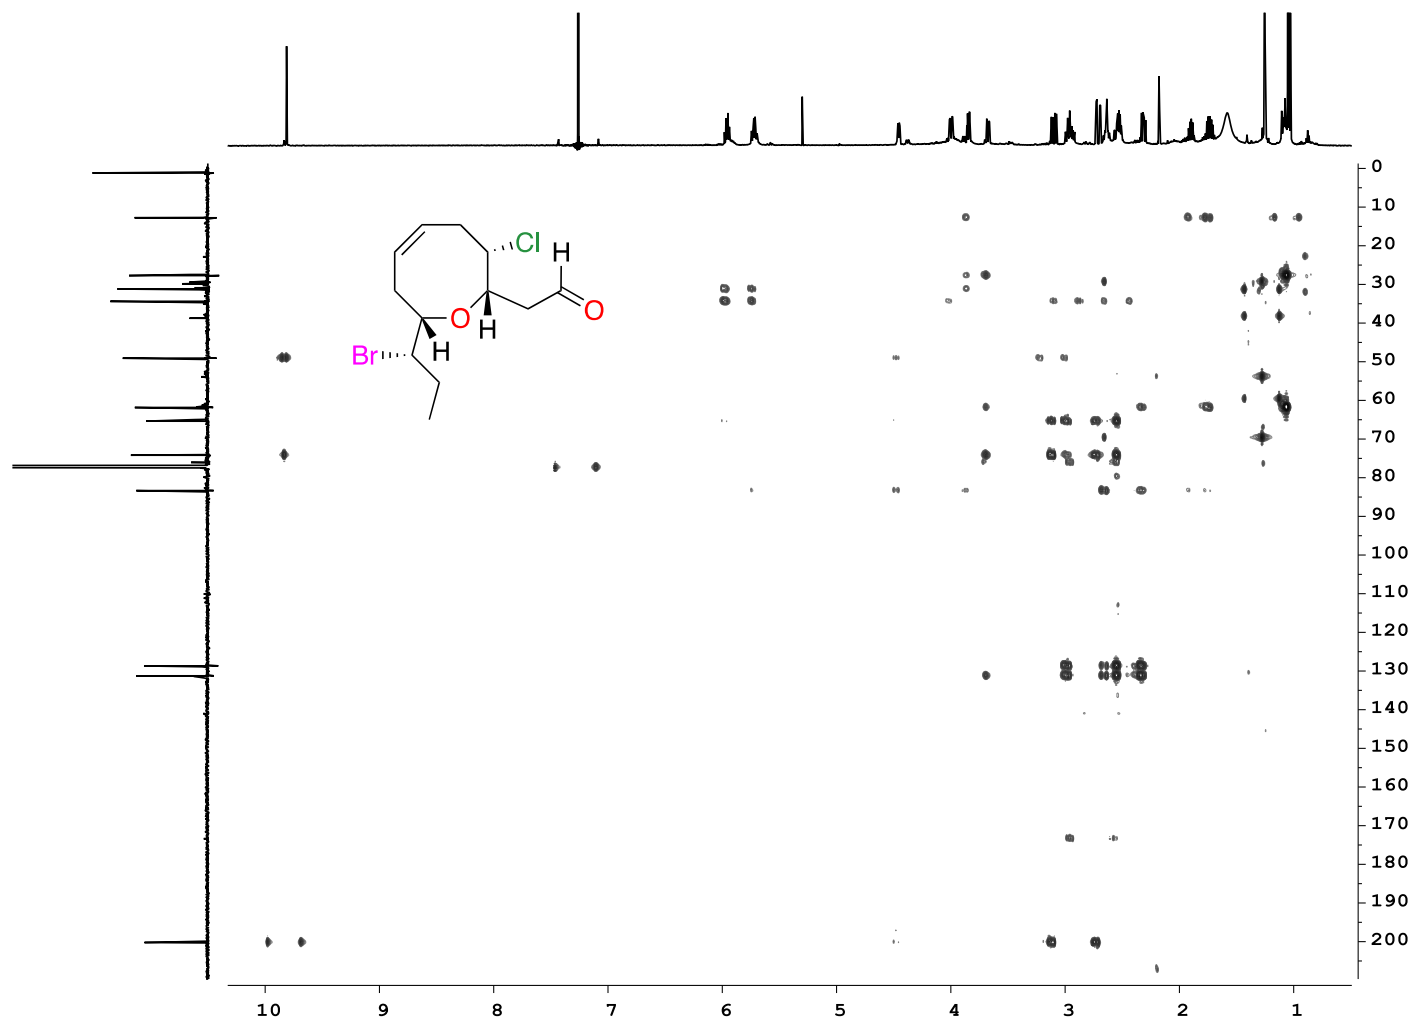

Figure S30. ROESY spectrum (600 MHz, CDCl<sub>3</sub>) for pinnatifidehyde 6.

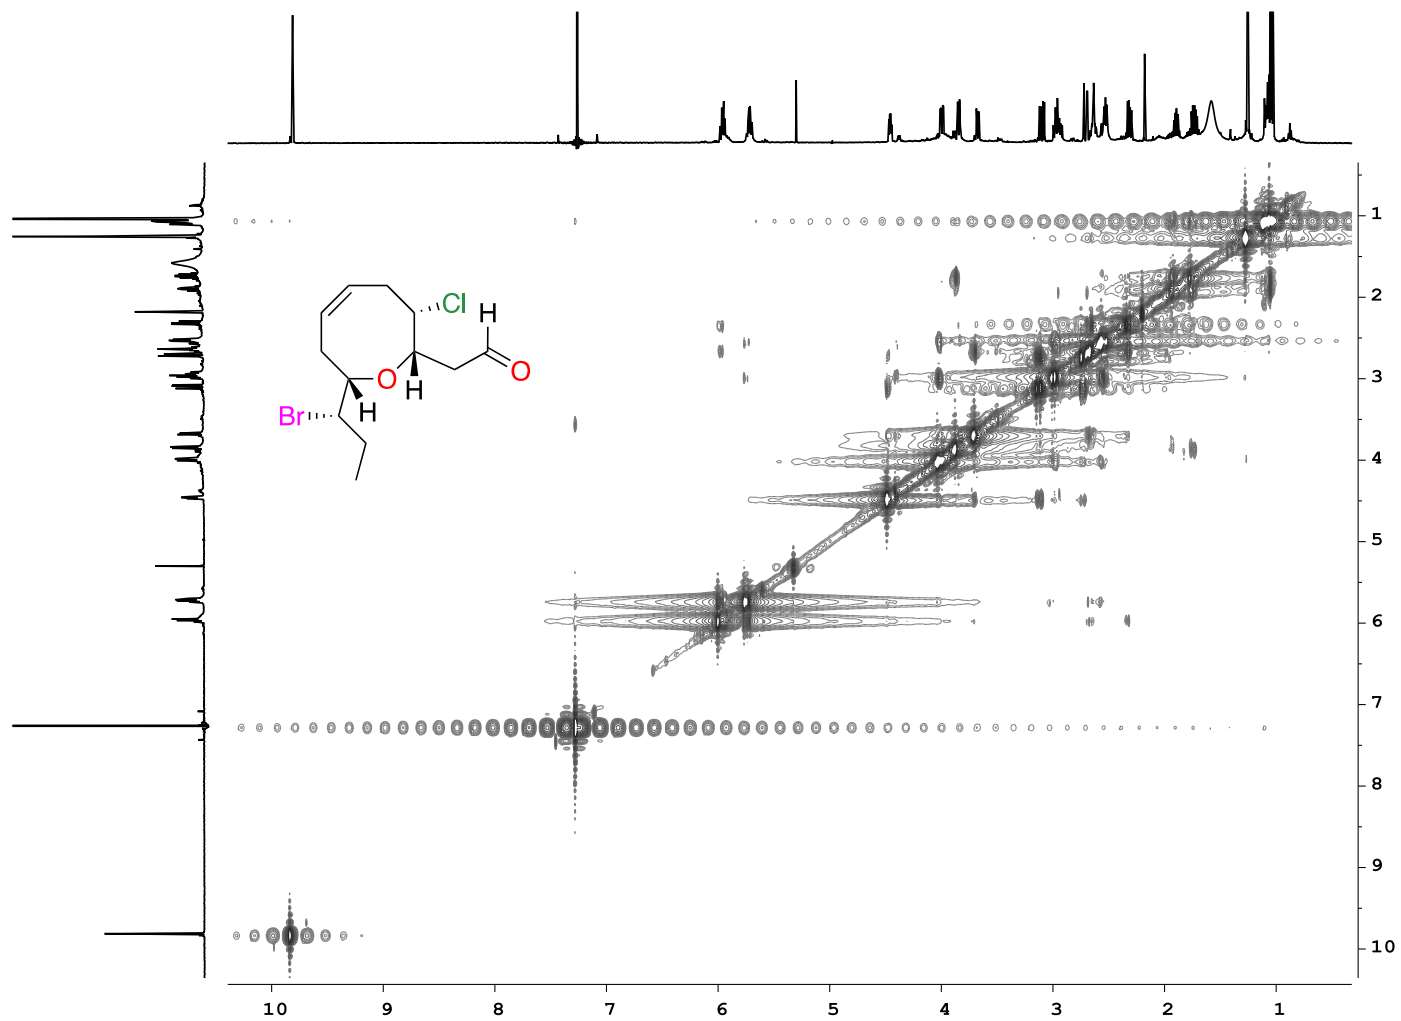

Figure S31. HRESIMS spectrum for pinnatifidehyde 6.

Elemental Composition Report

Multiple Mass Analysis: 3 mass(es) processed

Tolerance = 5.0 PPM / DBE: min = -10.0, max = 1000.0

Element prediction: Off

Number of isotope peaks used for i-FIT = 2

Monoisotopic Mass, Even Electron Ions

1618 formula(e) evaluated with 13 results within limits (all results (up to 1000) for each mass)

Elements Used:

C: 0-60 H: 0-120 O: 0-3 Na: 0-1 35Cl: 0-1 37Cl: 0-1 79Br: 0-1 81Br: 0-1

ESI-318 Olivia M (Omf-17b) 137 (5.984)

1: TOF MS ES+  
2.07e+002

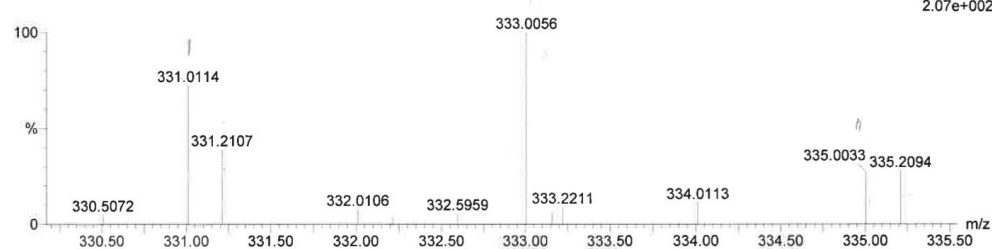

| Mass     | RA     | Calc. Mass | mDa  | PPM  | DBE  | i-FIT | Formula                  |
|----------|--------|------------|------|------|------|-------|--------------------------|
| 331.0114 | 72.33  | 331.0107   | 0.7  | 2.1  | 12.5 | 4.5   | C18 H11 O2 35Cl 37Cl     |
|          |        | 331.0122   | -0.8 | -2.4 | 14.5 | 6.4   | C20 H12 79Br             |
|          |        | 331.0104   | 1.0  | 3.0  | 18.5 | 8.5   | C22 H7 Na 37Cl           |
|          |        | 331.0101   | 1.3  | 3.9  | 6.5  | 2.1   | C15 H17 O 37Cl 81Br      |
|          |        | 331.0100   | 1.4  | 4.2  | 5.5  | 1.5   | C14 H17 O2 35Cl 79Br     |
|          |        | 331.0129   | -1.5 | -4.5 | 21.5 | 10.7  | C24 H6 37Cl              |
|          |        | 331.0098   | 1.6  | 4.8  | 11.5 | 4.5   | C18 H13 Na 79Br          |
| 331.2107 | 38.93  | ---        |      |      |      |       |                          |
| 333.0056 | 100.00 | 333.0056   | 0.0  | 0.0  | 2.5  | 0.5   | C12 H18 O2 Na 35Cl 81Br  |
|          |        | 333.0052   | 0.4  | 1.2  | 16.5 | 9.4   | C21 H9 35Cl 37Cl         |
|          |        | 333.0047   | 0.9  | 2.7  | 2.5  | 0.5   | C12 H18 O2 Na 37Cl 79Br  |
|          |        | 333.0046   | 1.0  | 3.0  | 9.5  | 4.4   | C17 H15 35Cl 79Br        |
|          |        | 333.0044   | 1.2  | 3.6  | -9.5 | 2.3   | C5 H28 O3 37Cl 79Br 81Br |
|          |        | 333.0071   | -1.5 | -4.5 | 5.5  | 1.7   | C14 H17 O2 37Cl 79Br     |

**Table S1.** Calculated vs experimental RMSD for compounds **3** and **4**.

| <b>Stereoisomers</b>                                                     | <b>RMSD (3)</b> | <b>RMSD (4)</b> |
|--------------------------------------------------------------------------|-----------------|-----------------|
| 3 <i>R</i> ,4 <i>R</i> ,6 <i>R</i> ,7 <i>R</i> ,12 <i>R</i> ,13 <i>S</i> | 2.3             | 2.3             |
| 3 <i>R</i> ,4 <i>R</i> ,6 <i>R</i> ,7 <i>R</i> ,12 <i>S</i> ,13 <i>S</i> | 3.8             | 3.8             |
| 3 <i>R</i> ,4 <i>R</i> ,6 <i>R</i> ,7 <i>S</i> ,12 <i>R</i> ,13 <i>S</i> | 3.0             | 2.7             |
| 3 <i>R</i> ,4 <i>R</i> ,6 <i>R</i> ,7 <i>S</i> ,12 <i>S</i> ,13 <i>S</i> | 2.7             | 2.6             |
| 3 <i>R</i> ,4 <i>R</i> ,6 <i>S</i> ,7 <i>R</i> ,12 <i>R</i> ,13 <i>S</i> | 2.6             | 2.7             |
| 3 <i>R</i> ,4 <i>R</i> ,6 <i>S</i> ,7 <i>R</i> ,12 <i>S</i> ,13 <i>S</i> | 3.0             | 2.7             |
| 3 <i>R</i> ,4 <i>R</i> ,6 <i>S</i> ,7 <i>S</i> ,12 <i>R</i> ,13 <i>S</i> | 2.4             | 2.5             |
| 3 <i>R</i> ,4 <i>R</i> ,6 <i>S</i> ,7 <i>S</i> ,12 <i>S</i> ,13 <i>S</i> | 2.2             | 2.2             |
| 3 <i>R</i> ,4 <i>S</i> ,6 <i>R</i> ,7 <i>R</i> ,12 <i>R</i> ,13 <i>S</i> | 2.2             | 2.0             |
| 3 <i>R</i> ,4 <i>S</i> ,6 <i>R</i> ,7 <i>R</i> ,12 <i>S</i> ,13 <i>S</i> | 3.6             | 3.5             |
| 3 <i>R</i> ,4 <i>S</i> ,6 <i>R</i> ,7 <i>S</i> ,12 <i>R</i> ,13 <i>S</i> | 3.7             | 3.4             |
| 3 <i>R</i> ,4 <i>S</i> ,6 <i>R</i> ,7 <i>S</i> ,12 <i>S</i> ,13 <i>S</i> | 2.5             | 2.3             |
| 3 <i>R</i> ,4 <i>S</i> ,6 <i>S</i> ,7 <i>R</i> ,12 <i>R</i> ,13 <i>S</i> | 2.2             | 2.2             |
| 3 <i>R</i> ,4 <i>S</i> ,6 <i>S</i> ,7 <i>R</i> ,12 <i>S</i> ,13 <i>S</i> | 2.4             | 2.3             |
| 3 <i>R</i> ,4 <i>S</i> ,6 <i>S</i> ,7 <i>S</i> ,12 <i>R</i> ,13 <i>S</i> | 3.3             | 3.4             |
| 3 <i>R</i> ,4 <i>S</i> ,6 <i>S</i> ,7 <i>S</i> ,12 <i>S</i> ,13 <i>S</i> | 1.6             | 1.6             |
| 3 <i>S</i> ,4 <i>R</i> ,6 <i>R</i> ,7 <i>R</i> ,12 <i>R</i> ,13 <i>S</i> | 2.0             | 2.0             |
| 3 <i>S</i> ,4 <i>R</i> ,6 <i>R</i> ,7 <i>R</i> ,12 <i>S</i> ,13 <i>S</i> | 3.5             | 3.5             |
| 3 <i>S</i> ,4 <i>R</i> ,6 <i>R</i> ,7 <i>S</i> ,12 <i>R</i> ,13 <i>S</i> | 3.0             | 2.7             |
| 3 <i>S</i> ,4 <i>R</i> ,6 <i>R</i> ,7 <i>S</i> ,12 <i>S</i> ,13 <i>S</i> | 3.1             | 3.1             |
| 3 <i>S</i> ,4 <i>R</i> ,6 <i>S</i> ,7 <i>R</i> ,12 <i>R</i> ,13 <i>S</i> | 2.5             | 2.5             |
| 3 <i>S</i> ,4 <i>R</i> ,6 <i>S</i> ,7 <i>R</i> ,12 <i>S</i> ,13 <i>S</i> | 2.7             | 2.4             |
| 3 <i>S</i> ,4 <i>R</i> ,6 <i>S</i> ,7 <i>S</i> ,12 <i>R</i> ,13 <i>S</i> | 2.2             | 2.3             |
| 3 <i>S</i> ,4 <i>R</i> ,6 <i>S</i> ,7 <i>S</i> ,12 <i>S</i> ,13 <i>S</i> | 1.9             | 1.8             |
| 3 <i>S</i> ,4 <i>S</i> ,6 <i>R</i> ,7 <i>R</i> ,12 <i>R</i> ,13 <i>S</i> | 2.3             | 2.3             |
| 3 <i>S</i> ,4 <i>S</i> ,6 <i>R</i> ,7 <i>R</i> ,12 <i>S</i> ,13 <i>S</i> | 3.8             | 3.9             |
| 3 <i>S</i> ,4 <i>S</i> ,6 <i>R</i> ,7 <i>S</i> ,12 <i>R</i> ,13 <i>S</i> | 3.3             | 3.0             |
| 3 <i>S</i> ,4 <i>S</i> ,6 <i>R</i> ,7 <i>S</i> ,12 <i>S</i> ,13 <i>S</i> | 2.4             | 2.4             |
| 3 <i>S</i> ,4 <i>S</i> ,6 <i>S</i> ,7 <i>R</i> ,12 <i>R</i> ,13 <i>S</i> | 2.9             | 3.0             |
| 3 <i>S</i> ,4 <i>S</i> ,6 <i>S</i> ,7 <i>R</i> ,12 <i>S</i> ,13 <i>S</i> | 2.9             | 2.8             |
| 3 <i>S</i> ,4 <i>S</i> ,6 <i>S</i> ,7 <i>S</i> ,12 <i>R</i> ,13 <i>S</i> | 2.9             | 3.0             |
| 3 <i>S</i> ,4 <i>S</i> ,6 <i>S</i> ,7 <i>S</i> ,12 <i>S</i> ,13 <i>S</i> | 2.2             | 2.3             |

**Table S2.** Scaled  $^{13}\text{C}$  and  $^1\text{H}$  chemical shifts for the two studied diastereoisomers on B3LYP-D3 in gas phase.

| #  | <i>3S,4R,6S,7S,12S,13S</i> |                     | <i>3R,4S,6S,7S,12S,13S</i> |                     |
|----|----------------------------|---------------------|----------------------------|---------------------|
|    | $\delta_{\text{H}}$        | $\delta_{\text{C}}$ | $\delta_{\text{H}}$        | $\delta_{\text{C}}$ |
| 1  | -                          | 68.4                | -                          | 68.3                |
| 2  | -                          | 71.2                | -                          | 70.8                |
| 3  | 3.18                       | 43.6                | 3.24                       | 44.0                |
| 4  | 3.04                       | 55.4                | 3.07                       | 56.3                |
| 5  | 2.19                       | 32.9                | 1.69                       | 33.9                |
|    | 1.84                       |                     |                            |                     |
| 6  | 4.14                       | 81.1                | 4.16                       | 80.9                |
| 7  | 4.15                       | 74.4                | 3.90                       | 74.8                |
| 8  | 3.08                       | 35.8                | 3.08                       | 35.9                |
|    | 2.37                       |                     |                            |                     |
| 9  | 5.83                       | 128.8               | 5.78                       | 128.6               |
| 10 | 5.96                       | 131.5               | 5.96                       | 131.9               |
| 11 | 2.59                       | 29.7                | 2.55                       | 28.6                |
|    | 2.37                       |                     |                            |                     |
| 12 | 3.58                       | 85.7                | 3.70                       | 85.0                |
| 13 | 4.15                       | -                   | 4.19                       | -                   |
| 14 | 1.76                       | 28.3                | 1.75                       | 27.7                |
|    | 2.23                       |                     |                            |                     |
| 15 | 1.13                       | 12.2                | 1.20                       | 12.3                |

**Figure S32.** Correlations plots for  $^{13}\text{C}$  and  $^1\text{H}$  calculated vs  $^{13}\text{C}$  and  $^1\text{H}$  experimental data for (3*R*,4*S*)-epoxy-pinnatifidenyne **3**.

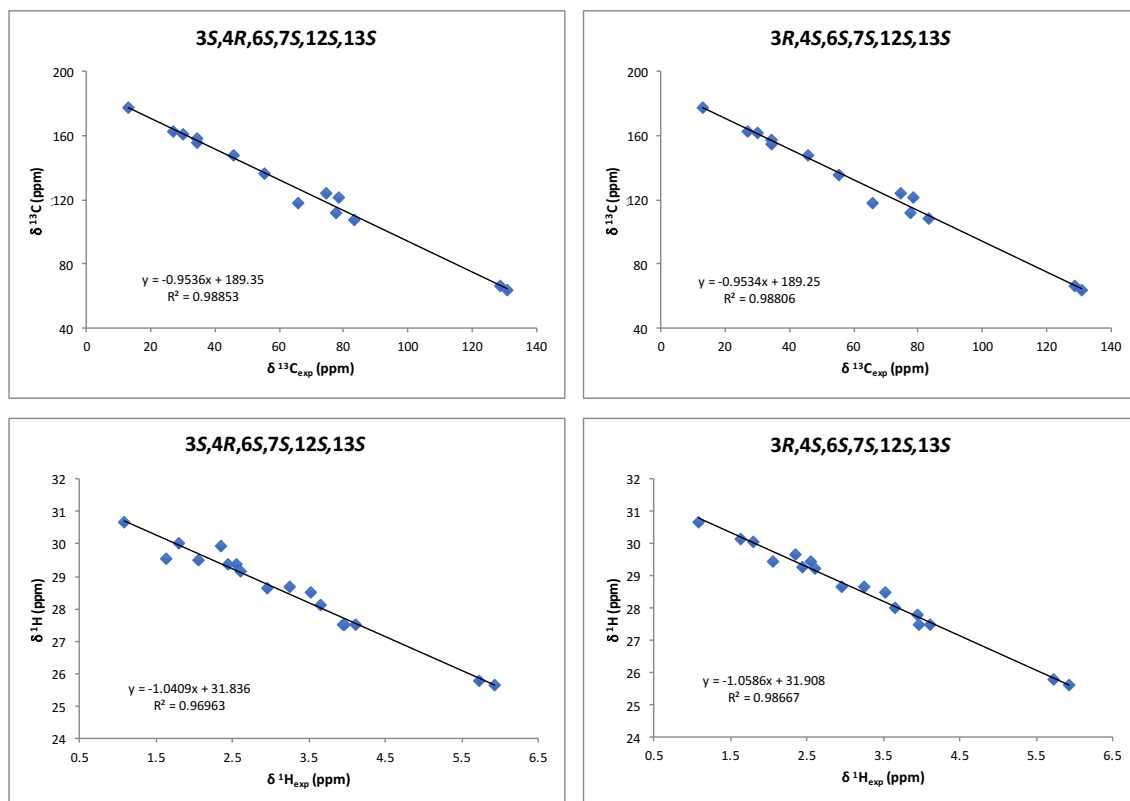

**Figure S33.** Correlations plots for  $^{13}\text{C}$  and  $^1\text{H}$  calculated vs  $^{13}\text{C}$  and  $^1\text{H}$  experimental data for (3*S*,4*R*)-epoxy-pinnatifidenyne **4**.

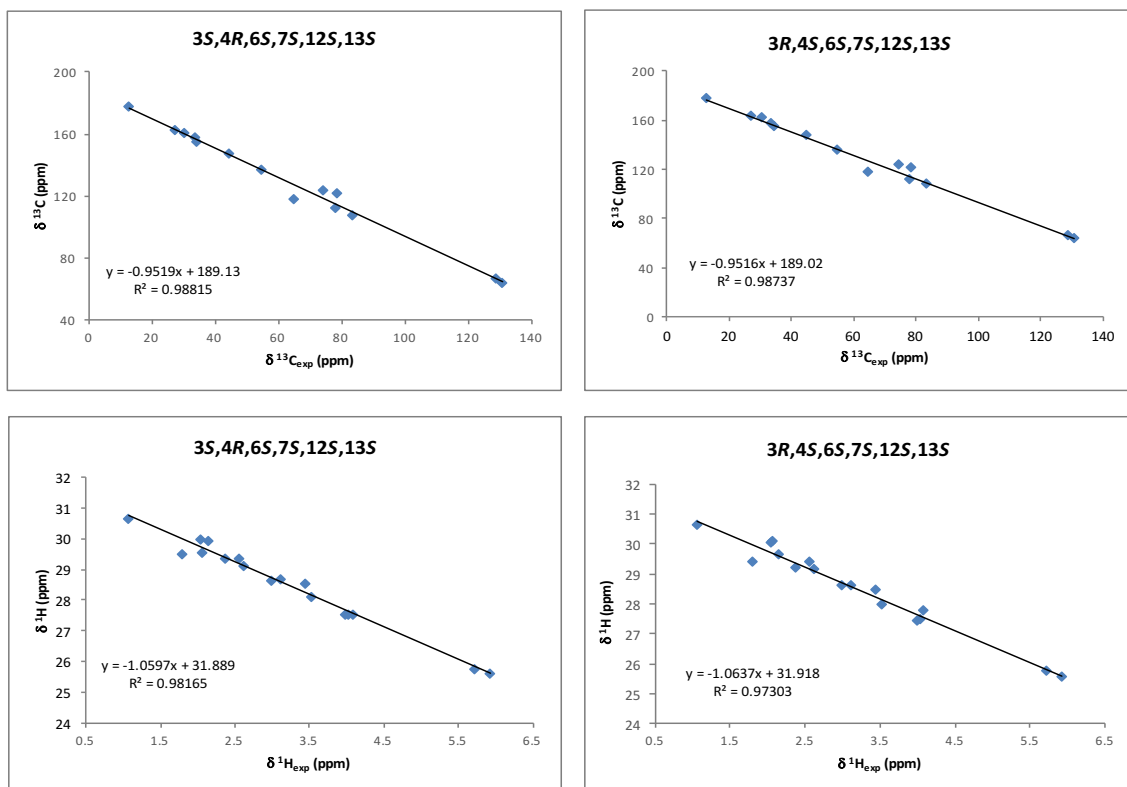

**Table S3.** Conformer 1 of 12 (RS\_1).

| Center Number |     | Coordinates |           |           | Center Number |     | Coordinates |           |           |
|---------------|-----|-------------|-----------|-----------|---------------|-----|-------------|-----------|-----------|
|               |     | X           | Y         | Z         |               |     | X           | Y         | Z         |
| 2             | C2  | 1,356258    | 0,224491  | -0,149649 | 23            | H23 | 1,818396    | -0,295031 | 0,700887  |
| 3             | C3  | 1,846167    | 1,676876  | -0,046055 | 24            | H24 | 2,93806     | 1,662938  | 0,035675  |
| 4             | C4  | 1,206311    | 2,434528  | 1,131132  | 25            | H25 | 0,141494    | 2,538087  | 0,903337  |
| 5             | C5  | 1,402677    | 1,712816  | 2,439534  | 26            | H26 | 1,64049     | 3,438288  | 1,170334  |
| 6             | C6  | 0,550262    | 0,813415  | 2,947444  | 27            | H27 | 2,330932    | 1,911787  | 2,973563  |
| 7             | C7  | -0,75943    | 0,392274  | 2,324352  | 28            | H28 | 0,819951    | 0,319296  | 3,879849  |
| 8             | C8  | -0,592345   | -0,540622 | 1,105381  | 29            | H29 | -1,31953    | 1,27295   | 1,990728  |
| 9             | C9  | 1,777682    | -0,513684 | -1,423249 | 30            | H30 | -1,372681   | -0,122564 | 3,069452  |
| 10            | C10 | 1,350529    | -1,95764  | -1,33542  | 31            | H31 | 2,864702    | -0,453895 | -1,540056 |
| 11            | C11 | 2,213051    | -3,095844 | -1,723332 | 32            | H32 | 1,312374    | -0,045945 | -2,296498 |
| 12            | C12 | 3,539557    | -2,905793 | -2,258793 | 33            | H33 | 5,613268    | -2,628356 | -3,148562 |
| 13            | C13 | 4,642048    | -2,760578 | -2,732465 | 34            | H34 | -1,687026   | -1,743721 | -0,29668  |
| 15            | H15 | 0,273148    | -2,122568 | -1,397724 | 35            | H35 | -3,347934   | 0,355857  | 1,184269  |
| 16            | H16 | 1,723442    | -4,021176 | -2,033209 | 36            | H36 | -2,496812   | 0,669073  | -0,32956  |
| 18            | C18 | -1,912239   | -1,129828 | 0,577197  | 37            | H37 | -3,843753   | -1,133817 | -1,467677 |
| 19            | C19 | -2,997967   | -0,112657 | 0,258404  | 38            | H38 | -4,699466   | -1,452327 | 0,050156  |
| 20            | C20 | -4,179391   | -0,682598 | -0,527211 | 39            | H39 | -4,897049   | 0,106938  | -0,769726 |
| 22            | H22 | 0,077085    | -1,373725 | 1,358867  |               |     |             |           |           |



**Table S4.** Conformer 2 of 12 (RS\_2).

| Center Number |     | Coordinates |           |           | Center Number |     | Coordinates |           |           |
|---------------|-----|-------------|-----------|-----------|---------------|-----|-------------|-----------|-----------|
|               |     | X           | Y         | Z         |               |     | X           | Y         | Z         |
| 2             | C2  | 1,362858    | 0,230162  | -0,179077 | 23            | H23 | 1,821408    | -0,293265 | 0,671404  |
| 3             | C3  | 1,854694    | 1,681152  | -0,067842 | 24            | H24 | 2,947021    | 1,665095  | 0,010027  |
| 4             | C4  | 1,221533    | 2,431804  | 1,117393  | 25            | H25 | 0,155771    | 2,540323  | 0,895598  |
| 5             | C5  | 1,420741    | 1,701442  | 2,41987   | 26            | H26 | 1,658849    | 3,434047  | 1,160847  |
| 6             | C6  | 0,569507    | 0,798682  | 2,9235    | 27            | H27 | 2,35068     | 1,895517  | 2,952661  |
| 7             | C7  | -0,742475   | 0,382197  | 2,302539  | 28            | H28 | 0,842179    | 0,29805   | 3,851508  |
| 8             | C8  | -0,585179   | -0,536854 | 1,072464  | 29            | H29 | -1,308299   | 1,265904  | 1,987179  |
| 9             | C9  | 1,78898     | -0,505632 | -1,453104 | 30            | H30 | -1,347545   | -0,146659 | 3,045258  |
| 10            | C10 | 1,332197    | -1,941381 | -1,38402  | 31            | H31 | 2,879275    | -0,467949 | -1,548524 |
| 11            | C11 | 2,188318    | -3,096427 | -1,734507 | 32            | H32 | 1,348654    | -0,023436 | -2,331424 |
| 12            | C12 | 3,541395    | -2,935938 | -2,209075 | 33            | H33 | 5,660873    | -2,707457 | -2,998477 |
| 13            | C13 | 4,667971    | -2,8164   | -2,629798 | 34            | H34 | -1,712866   | -1,713418 | -0,327146 |
| 15            | H15 | 0,255624    | -2,086374 | -1,490717 | 35            | H35 | -3,965953   | -0,804963 | 0,090447  |
| 16            | H16 | 1,693441    | -4,012    | -2,064437 | 36            | H36 | -3,353844   | 0,279879  | 1,324554  |
| 18            | C18 | -1,916155   | -1,140145 | 0,578648  | 37            | H37 | -2,613233   | 0,393852  | -1,6726   |
| 19            | C19 | -3,099228   | -0,198925 | 0,373057  | 38            | H38 | -3,743777   | 1,474975  | -0,837302 |
| 20            | C20 | -2,846083   | 0,862074  | -0,710883 | 39            | H39 | -2,007285   | 1,513555  | -0,460594 |
| 22            | H22 | 0,090089    | -1,367772 | 1,31567   |               |     |             |           |           |

**Table S5.** Conformer 3 of 12 (RS\_7).

| Center Number |     | Coordinates |           |           | Center Number |     | Coordinates |           |           |
|---------------|-----|-------------|-----------|-----------|---------------|-----|-------------|-----------|-----------|
|               |     | X           | Y         | Z         |               |     | X           | Y         | Z         |
| 2             | C2  | 1,372806    | 0,065053  | -0,052312 | 23            | H23 | 1,791594    | -0,419661 | 0,839934  |
| 3             | C3  | 1,899555    | 1,511021  | -0,002775 | 24            | H24 | 2,984042    | 1,479457  | 0,143799  |
| 4             | C4  | 1,220054    | 2,361754  | 1,083902  | 25            | H25 | 0,176075    | 2,491045  | 0,785542  |
| 5             | C5  | 1,310103    | 1,723182  | 2,446645  | 26            | H26 | 1,688657    | 3,351002  | 1,088481  |
| 6             | C6  | 0,396201    | 0,890906  | 2,961066  | 27            | H27 | 2,209773    | 1,931914  | 3,024214  |
| 7             | C7  | -0,885221   | 0,464438  | 2,285302  | 28            | H28 | 0,587096    | 0,460651  | 3,943253  |
| 8             | C8  | -0,656876   | -0,560302 | 1,15319   | 29            | H29 | -1,39324    | 1,330543  | 1,846914  |
| 9             | C9  | 1,78806     | -0,754727 | -1,281855 | 30            | H30 | -1,564916   | 0,0275    | 3,022579  |
| 10            | C10 | 3,277181    | -0,740639 | -1,542639 | 31            | H31 | 1,256078    | -0,371436 | -2,157893 |
| 11            | C11 | 4,216939    | -1,595605 | -0,771021 | 32            | H32 | 1,46898     | -1,788581 | -1,12064  |
| 12            | C12 | 3,747272    | -2,472509 | 0,277509  | 33            | H33 | 3,02837     | -3,832788 | 1,952136  |
| 13            | C13 | 3,365586    | -3,191997 | 1,170886  | 34            | H34 | -1,665058   | -1,860698 | -0,224075 |
| 15            | H15 | 3,680787    | 0,191509  | -1,943244 | 35            | H35 | -3,391567   | 0,363696  | 0,982649  |
| 16            | H16 | 5,248578    | -1,257214 | -0,656258 | 36            | H36 | -2,448576   | 0,547371  | -0,496235 |
| 18            | C18 | -1,943565   | -1,180269 | 0,582703  | 37            | H37 | -4,699875   | -1,51704  | -0,088341 |
| 19            | C19 | -2,993534   | -0,181378 | 0,119894  | 38            | H38 | -4,826271   | -0,023395 | -1,032968 |
| 20            | C20 | -4,134674   | -0,798753 | -0,689192 | 39            | H39 | -3,751758   | -1,322464 | -1,572196 |
| 22            | H22 | -0,015496   | -1,375621 | 1,515397  |               |     |             |           |           |

**Table S6.** Conformer 4 of 12 (RS\_11).

| Center Number |     | Coordinates |           |           | Center Number |     | Coordinates |           |           |
|---------------|-----|-------------|-----------|-----------|---------------|-----|-------------|-----------|-----------|
|               |     | X           | Y         | Z         |               |     | X           | Y         | Z         |
| 2             | C2  | 1,390582    | 0,054795  | -0,062719 | 23            | H23 | 1,77462     | -0,448905 | 0,836303  |
| 3             | C3  | 1,966832    | 1,484455  | 0,003727  | 24            | H24 | 3,046066    | 1,41317   | 0,177406  |
| 4             | C4  | 1,292512    | 2,353084  | 1,075403  | 25            | H25 | 0,255443    | 2,504812  | 0,761942  |
| 5             | C5  | 1,351847    | 1,711905  | 2,436511  | 26            | H26 | 1,786076    | 3,330296  | 1,085978  |
| 6             | C6  | 0,408695    | 0,906496  | 2,939453  | 27            | H27 | 2,252271    | 1,893314  | 3,022538  |
| 7             | C7  | -0,875689   | 0,522429  | 2,246295  | 28            | H28 | 0,575673    | 0,47245   | 3,924627  |
| 8             | C8  | -0,669351   | -0,49683  | 1,103885  | 29            | H29 | -1,368647   | 1,399872  | 1,815611  |
| 9             | C9  | 1,807095    | -0,771912 | -1,289043 | 30            | H30 | -1,573592   | 0,093147  | 2,974323  |
| 10            | C10 | 3,30417     | -0,865623 | -1,473866 | 31            | H31 | 1,348262    | -0,334231 | -2,180856 |
| 11            | C11 | 4,130572    | -1,809698 | -0,676562 | 32            | H32 | 1,408116    | -1,783032 | -1,170711 |
| 12            | C12 | 3,535173    | -2,67388  | 0,316713  | 33            | H33 | 2,628272    | -4,019105 | 1,907662  |
| 13            | C13 | 3,049541    | -3,383415 | 1,164633  | 34            | H34 | -2,456859   | -1,637133 | 1,486485  |
| 15            | H15 | 3,799448    | 0,04124   | -1,826388 | 35            | H35 | -2,745073   | -2,532034 | -0,83072  |
| 16            | H16 | 5,176954    | -1,556541 | -0,493762 | 36            | H36 | -1,299975   | -1,663059 | -1,349403 |
| 18            | C18 | -1,956662   | -1,178372 | 0,629187  | 37            | H37 | 0,123136    | -3,108247 | 0,159088  |
| 19            | C19 | -1,761288   | -2,181308 | -0,5036   | 38            | H38 | -1,332652   | -3,887212 | 0,800163  |
| 20            | C20 | -0,908293   | -3,387047 | -0,078528 | 39            | H39 | -0,867728   | -4,120112 | -0,890037 |
| 22            | H22 | -0,042755   | -1,318627 | 1,491584  |               |     |             |           |           |

**Table S7.** Conformer 5 of 12 (RS\_12).

| Center Number |     | Coordinates |           |           | Center Number |     | Coordinates |           |           |
|---------------|-----|-------------|-----------|-----------|---------------|-----|-------------|-----------|-----------|
|               |     | X           | Y         | Z         |               |     | X           | Y         | Z         |
| 2             | C2  | 1,377524    | 0,059978  | -0,061933 | 23            | H23 | 1,788541    | -0,429875 | 0,831345  |
| 3             | C3  | 1,90634     | 1,504753  | -0,002903 | 24            | H24 | 2,990418    | 1,470349  | 0,145732  |
| 4             | C4  | 1,227476    | 2,353251  | 1,085781  | 25            | H25 | 0,185674    | 2,492725  | 0,784163  |
| 5             | C5  | 1,306026    | 1,70756   | 2,445611  | 26            | H26 | 1,703013    | 3,339087  | 1,097759  |
| 6             | C6  | 0,384808    | 0,877267  | 2,949989  | 27            | H27 | 2,203371    | 1,908359  | 3,029519  |
| 7             | C7  | -0,893989   | 0,459763  | 2,263702  | 28            | H28 | 0,567244    | 0,441566  | 3,931301  |
| 8             | C8  | -0,663691   | -0,558889 | 1,127348  | 29            | H29 | -1,399147   | 1,330377  | 1,83104   |
| 9             | C9  | 1,799758    | -0,75388  | -1,293178 | 30            | H30 | -1,577438   | 0,016615  | 2,994413  |
| 10            | C10 | 3,289857    | -0,736796 | -1,548295 | 31            | H31 | 1,270764    | -0,366782 | -2,169334 |
| 11            | C11 | 4,227443    | -1,593563 | -0,776345 | 32            | H32 | 1,481252    | -1,78871  | -1,137991 |
| 12            | C12 | 3,753933    | -2,474466 | 0,266911  | 33            | H33 | 3,02671     | -3,840988 | 1,932699  |
| 13            | C13 | 3,368591    | -3,197423 | 1,15574   | 34            | H34 | -1,68986    | -1,830139 | -0,264834 |
| 15            | H15 | 3,693981    | 0,19743   | -1,943419 | 35            | H35 | -3,966041   | -0,879685 | -0,069707 |
| 16            | H16 | 5,258193    | -1,254443 | -0,656211 | 36            | H36 | -3,42468    | 0,296287  | 1,110867  |
| 18            | C18 | -1,957309   | -1,190428 | 0,577733  | 37            | H37 | -3,666794   | 1,292995  | -1,184949 |
| 19            | C19 | -3,111838   | -0,259142 | 0,219971  | 38            | H38 | -1,973829   | 1,399907  | -0,659882 |
| 20            | C20 | -2,776955   | 0,710541  | -0,925645 | 39            | H39 | -2,450879   | 0,169199  | -1,819354 |
| 22            | H22 | -0,021498   | -1,372536 | 1,490993  |               |     |             |           |           |

**Table S8.** Conformer 6 of 12 (RS\_12).

| Center Number |     | Coordinates |           |           | Center Number |     | Coordinates |           |           |
|---------------|-----|-------------|-----------|-----------|---------------|-----|-------------|-----------|-----------|
|               |     | X           | Y         | Z         |               |     | X           | Y         | Z         |
| 2             | C2  | 1,359151    | 0,110221  | -0,105043 | 23            | H23 | 1,639856    | 3,385589  | 1,072554  |
| 3             | C3  | 1,857889    | 1,565315  | -0,04928  | 24            | H24 | 2,23504     | 1,936838  | 2,967823  |
| 4             | C4  | 1,188017    | 2,388688  | 1,062688  | 25            | H25 | 0,659496    | 0,414891  | 3,891978  |
| 5             | C5  | 1,323442    | 1,726781  | 2,410107  | 26            | H26 | -1,379694   | 1,306276  | 1,860251  |
| 6             | C6  | 0,437046    | 0,866932  | 2,926447  | 27            | H27 | -1,511479   | -0,020571 | 3,014687  |
| 7             | C7  | -0,853437   | 0,43744   | 2,270516  | 28            | H28 | 0,003876    | -1,386486 | 1,451238  |
| 8             | C8  | -0,644701   | -0,5658   | 1,115098  | 29            | H29 | 1,284864    | -0,307656 | -2,222271 |
| 9             | C9  | 1,80021     | -0,693132 | -1,337037 | 30            | H30 | 1,486327    | -1,730677 | -1,188104 |
| 10            | C10 | 3,293757    | -0,62362  | -1,547423 | 31            | H31 | 3,660624    | 0,297466  | -2,005719 |
| 11            | C11 | 4,150502    | -1,823822 | -1,708193 | 32            | H32 | 5,085333    | -1,709734 | -2,260401 |
| 12            | C12 | 3,605019    | -3,159997 | -1,715578 | 33            | H33 | 2,768504    | -5,273158 | -1,765395 |
| 13            | C13 | 3,161686    | -4,283547 | -1,744018 | 34            | H34 | -1,687807   | -1,834242 | -0,267549 |
| 16            | C16 | -1,944771   | -1,176002 | 0,564387  | 35            | H35 | -3,377558   | 0,356934  | 1,048411  |
| 17            | C17 | -3,010917   | -0,168764 | 0,160194  | 36            | H36 | -2,487993   | 0,573508  | -0,45893  |
| 18            | C18 | -4,182042   | -0,76828  | -0,618647 | 37            | H37 | -3,833801   | -1,273251 | -1,526515 |
| 20            | H20 | 1,799939    | -0,37032  | 0,778064  | 38            | H38 | -4,724798   | -1,498903 | -0,011957 |
| 21            | H21 | 2,945311    | 1,552538  | 0,071317  | 39            | H39 | -4,885254   | 0,014858  | -0,918637 |
| 22            | H22 | 0,134918    | 2,503409  | 0,791398  |               |     |             |           |           |

**Table S9.** Conformer 7 of 12 (SR\_1).

| Center Number |     | Coordinates |           |           | Center Number |     | Coordinates |           |           |
|---------------|-----|-------------|-----------|-----------|---------------|-----|-------------|-----------|-----------|
|               |     | X           | Y         | Z         |               |     | X           | Y         | Z         |
| 2             | C2  | 1,423953    | 0,299663  | -0,156669 | 23            | H23 | 1,574963    | 3,581268  | 1,020753  |
| 3             | C3  | 1,873694    | 1,77118   | -0,09606  | 24            | H24 | 2,277649    | 2,190017  | 2,921685  |
| 4             | C4  | 1,179942    | 2,560654  | 1,027883  | 25            | H25 | 0,793126    | 0,610718  | 3,894907  |
| 5             | C5  | 1,370965    | 1,924656  | 2,379356  | 26            | H26 | -1,32801    | 1,354946  | 1,891388  |
| 6             | C6  | 0,534688    | 1,032257  | 2,924388  | 27            | H27 | -1,351462   | 0,025458  | 3,052716  |
| 7             | C7  | -0,739525   | 0,522925  | 2,29468   | 28            | H28 | 0,24139     | -1,227288 | 1,459729  |
| 8             | C8  | -0,48857    | -0,470766 | 1,140847  | 29            | H29 | 2,975792    | -0,580681 | -1,36988  |
| 9             | C9  | 1,88732     | -0,465213 | -1,402721 | 30            | H30 | 1,630914    | 0,088126  | -2,310691 |
| 10            | C10 | 1,245898    | -1,832944 | -1,471738 | 31            | H31 | 0,197422    | -1,832962 | -1,771924 |
| 11            | C11 | 1,685245    | -2,975043 | -0,632723 | 32            | H32 | 0,947466    | -3,742006 | -0,387792 |
| 12            | C12 | 2,762031    | -2,844773 | 0,320054  | 33            | H33 | 4,417043    | -2,649569 | 1,867308  |
| 13            | C13 | 3,639746    | -2,737843 | 1,145043  | 34            | H34 | -1,4641     | -1,862818 | -0,170364 |
| 16            | C16 | -1,747982   | -1,205896 | 0,653293  | 35            | H35 | -3,296335   | 0,205931  | 1,148369  |
| 17            | C17 | -2,913687   | -0,311171 | 0,261869  | 36            | H36 | -2,47739    | 0,45516   | -0,394574 |
| 18            | C18 | -4,04694    | -1,038628 | -0,462579 | 37            | H37 | -3,675086   | -1,550422 | -1,357152 |
| 20            | H20 | 1,890763    | -0,173067 | 0,719097  | 38            | H38 | -4,509881   | -1,787021 | 0,18668   |
| 21            | H21 | 2,962961    | 1,786366  | 0,018454  | 39            | H39 | -4,820546   | -0,331209 | -0,77577  |
| 22            | H22 | 0,117552    | 2,610883  | 0,771239  |               |     |             |           |           |

**Table S10.** Conformer 8 of 12 (SR\_10).

| Center Number |     | Coordinates |           |           | Center Number |     | Coordinates |           |           |
|---------------|-----|-------------|-----------|-----------|---------------|-----|-------------|-----------|-----------|
|               |     | X           | Y         | Z         |               |     | X           | Y         | Z         |
| 2             | C2  | 1,364764    | 0,10005   | -0,108694 | 23            | H23 | 1,68717     | 3,368483  | 1,077735  |
| 3             | C3  | 1,881189    | 1,548088  | -0,047204 | 24            | H24 | 2,246176    | 1,914556  | 2,977149  |
| 4             | C4  | 1,219143    | 2,379221  | 1,064246  | 25            | H25 | 0,645005    | 0,415569  | 3,891939  |
| 5             | C5  | 1,336551    | 1,715152  | 2,412454  | 26            | H26 | -1,375337   | 1,328568  | 1,854901  |
| 6             | C6  | 0,435348    | 0,867709  | 2,923704  | 27            | H27 | -1,519579   | -0,005826 | 2,999229  |
| 7             | C7  | -0,856179   | 0,452998  | 2,259693  | 28            | H28 | -0,008396   | -1,369964 | 1,440334  |
| 8             | C8  | -0,653625   | -0,547969 | 1,10205   | 29            | H29 | 1,276866    | -0,321762 | -2,223636 |
| 9             | C9  | 1,799323    | -0,705161 | -1,341841 | 30            | H30 | 1,487338    | -1,742468 | -1,187711 |
| 10            | C10 | 3,29105     | -0,633616 | -1,565496 | 31            | H31 | 3,649375    | 0,277902  | -2,048746 |
| 11            | C11 | 4,152993    | -1,833181 | -1,702418 | 32            | H32 | 5,08294     | -1,728584 | -2,264445 |
| 12            | C12 | 3,615479    | -3,172103 | -1,667779 | 33            | H33 | 2,791172    | -5,290574 | -1,646132 |
| 13            | C13 | 3,178578    | -4,298462 | -1,658759 | 34            | H34 | -1,722381   | -1,771188 | -0,301387 |
| 16            | C16 | -1,963495   | -1,164223 | 0,572672  | 35            | H35 | -3,993324   | -0,835801 | 0,002808  |
| 17            | C17 | -3,131638   | -0,22418  | 0,289008  | 36            | H36 | -3,416319   | 0,293744  | 1,211268  |
| 18            | C18 | -2,836781   | 0,792334  | -0,826491 | 37            | H37 | -3,733451   | 1,387707  | -1,026118 |
| 20            | H20 | 1,795451    | -0,38847  | 0,774735  | 38            | H38 | -2,020847   | 1,46724   | -0,562982 |
| 21            | H21 | 2,967898    | 1,52097   | 0,076553  | 39            | H39 | -2,547469   | 0,288479  | -1,754074 |
| 22            | H22 | 0,169208    | 2,512939  | 0,789476  |               |     |             |           |           |

**Table S11.** Conformer 9 of 12 (SR\_9).

| Center Number |     | Coordinates |           |           | Center Number |     | Coordinates |           |           |
|---------------|-----|-------------|-----------|-----------|---------------|-----|-------------|-----------|-----------|
|               |     | X           | Y         | Z         |               |     | X           | Y         | Z         |
| 2             | C2  | 1,40512     | 0,116423  | -0,167171 | 23            | H23 | 1,715929    | 3,398943  | 0,986445  |
| 3             | C3  | 1,920551    | 1,568189  | -0,120075 | 24            | H24 | 2,337183    | 1,957086  | 2,877621  |
| 4             | C4  | 1,262078    | 2,402589  | 0,987862  | 25            | H25 | 0,771788    | 0,441249  | 3,830102  |
| 5             | C5  | 1,416751    | 1,746192  | 2,334446  | 26            | H26 | -1,30864    | 1,338105  | 1,842258  |
| 6             | C6  | 0,536788    | 0,88917   | 2,865301  | 27            | H27 | -1,410535   | 0,005035  | 2,983746  |
| 7             | C7  | -0,765624   | 0,469573  | 2,228579  | 28            | H28 | 0,054689    | -1,349384 | 1,401201  |
| 8             | C8  | -0,594176   | -0,524518 | 1,057395  | 29            | H29 | 1,343673    | -0,297738 | -2,287995 |
| 9             | C9  | 1,839779    | -0,695594 | -1,397115 | 30            | H30 | 1,50051     | -1,7258   | -1,256326 |
| 10            | C10 | 3,336575    | -0,66489  | -1,589807 | 31            | H31 | 3,73227     | 0,238647  | -2,059379 |
| 11            | C11 | 4,160955    | -1,89193  | -1,716576 | 32            | H32 | 5,105663    | -1,818211 | -2,259454 |
| 12            | C12 | 3,574738    | -3,210288 | -1,701655 | 33            | H33 | 2,672654    | -5,295158 | -1,720698 |
| 13            | C13 | 3,095733    | -4,318165 | -1,712881 | 34            | H34 | -2,344278   | -1,70153  | 1,493755  |
| 16            | C16 | -1,897564   | -1,205098 | 0,627908  | 35            | H35 | -2,758555   | -2,505644 | -0,838736 |
| 17            | C17 | -1,759819   | -2,159768 | -0,554015 | 36            | H36 | -1,351792   | -1,602865 | -1,402676 |
| 18            | C18 | -0,8758     | -3,373871 | -0,230419 | 37            | H37 | -1,242867   | -3,914554 | 0,649955  |
| 20            | H20 | 1,843682    | -0,366192 | 0,717221  | 38            | H38 | -0,878068   | -4,071854 | -1,073532 |
| 21            | H21 | 3,008377    | 1,543037  | 0,000254  | 39            | H39 | 0,165504    | -3,094576 | -0,043278 |
| 22            | H22 | 0,205527    | 2,515782  | 0,727448  |               |     |             |           |           |



**Table S12.** Conformer 10 of 12 (RS\_2).

| Center Number |     | Coordinates |           |           | Center Number |     | Coordinates |           |           |
|---------------|-----|-------------|-----------|-----------|---------------|-----|-------------|-----------|-----------|
|               |     | X           | Y         | Z         |               |     | X           | Y         | Z         |
| 2             | C2  | 1,419332    | 0,279088  | -0,170584 | 23            | H23 | 1,548584    | 3,566262  | 0,993369  |
| 3             | C3  | 1,856343    | 1,755851  | -0,11738  | 24            | H24 | 2,256613    | 2,182923  | 2,897561  |
| 4             | C4  | 1,158034    | 2,543806  | 1,003337  | 25            | H25 | 0,781526    | 0,596294  | 3,871504  |
| 5             | C5  | 1,35175     | 1,911697  | 2,355052  | 26            | H26 | -1,347267   | 1,32572   | 1,87614   |
| 6             | C6  | 0,520797    | 1,014559  | 2,900117  | 27            | H27 | -1,352316   | -0,012009 | 3,029808  |
| 7             | C7  | -0,749302   | 0,496203  | 2,270965  | 28            | H28 | 0,240129    | -1,242254 | 1,436588  |
| 8             | C8  | -0,497543   | -0,494628 | 1,11542   | 29            | H29 | 2,992054    | -0,590731 | -1,362574 |
| 9             | C9  | 1,901966    | -0,49534  | -1,40385  | 30            | H30 | 1,639005    | 0,039459  | -2,321004 |
| 10            | C10 | 1,289732    | -1,877041 | -1,455825 | 31            | H31 | 0,241099    | -1,903771 | -1,755277 |
| 11            | C11 | 1,751834    | -2,998195 | -0,601791 | 32            | H32 | 1,028648    | -3,776031 | -0,347516 |
| 12            | C12 | 2,823152    | -2,833277 | 0,350807  | 33            | H33 | 4,468392    | -2,582694 | 1,899351  |
| 13            | C13 | 3,695624    | -2,697146 | 1,176275  | 34            | H34 | -1,490767   | -1,886826 | -0,18606  |
| 16            | C16 | -1,761237   | -1,251712 | 0,658803  | 35            | H35 | -3,824221   | -1,139784 | 0,12248   |
| 17            | C17 | -3,015393   | -0,439495 | 0,354861  | 36            | H36 | -3,324467   | 0,10555   | 1,253447  |
| 18            | C18 | -2,827846   | 0,530119  | -0,824207 | 37            | H37 | -3,766457   | 1,059802  | -1,013115 |
| 20            | H20 | 1,879393    | -0,181854 | 0,715951  | 38            | H38 | -2,043083   | 1,26309   | -0,630821 |
| 21            | H21 | 2,945764    | 1,781126  | -0,002342 | 39            | H39 | -2,548195   | -0,008829 | -1,735307 |
| 22            | H22 | 0,094751    | 2,588231  | 0,747202  |               |     |             |           |           |

**Table S13.** Conformer 11 of 12 (SR\_6).

| Center Number |     | Coordinates |           |           | Center Number |     | Coordinates |           |           |
|---------------|-----|-------------|-----------|-----------|---------------|-----|-------------|-----------|-----------|
|               |     | X           | Y         | Z         |               |     | X           | Y         | Z         |
| 2             | C2  | 1,39666     | 0,087493  | -0,130463 | 23            | H23 | 1,743147    | 3,353468  | 1,053318  |
| 3             | C3  | 1,935103    | 1,528132  | -0,064219 | 24            | H24 | 2,321889    | 1,89893   | 2,947269  |
| 4             | C4  | 1,276158    | 2,363601  | 1,044382  | 25            | H25 | 0,72638     | 0,404435  | 3,878657  |
| 5             | C5  | 1,405973    | 1,701374  | 2,391772  | 26            | H26 | -1,322413   | 1,32882   | 1,871982  |
| 6             | C6  | 0,50817     | 0,856112  | 2,911785  | 27            | H27 | -1,450744   | -0,009243 | 3,003907  |
| 7             | C7  | -0,792572   | 0,453294  | 2,259358  | 28            | H28 | 0,018186    | -1,370887 | 1,423864  |
| 8             | C8  | -0,618833   | -0,533838 | 1,083501  | 29            | H29 | 1,294986    | -0,310133 | -2,249546 |
| 9             | C9  | 1,814031    | -0,712088 | -1,373799 | 30            | H30 | 1,485802    | -1,746156 | -1,232447 |
| 10            | C10 | 3,305285    | -0,661705 | -1,601106 | 31            | H31 | 3,679559    | 0,259142  | -2,053758 |
| 11            | C11 | 4,144074    | -1,871409 | -1,784749 | 32            | H32 | 5,073693    | -1,764365 | -2,347228 |
| 12            | C12 | 3,582792    | -3,201026 | -1,798247 | 33            | H33 | 2,730801    | -5,307017 | -1,86396  |
| 13            | C13 | 3,130378    | -4,320329 | -1,834189 | 34            | H34 | -2,387358   | -1,694241 | 1,493913  |
| 16            | C16 | -1,918643   | -1,208213 | 0,634104  | 35            | H35 | -1,394976   | -1,620558 | -1,399372 |
| 17            | C17 | -1,723891   | -2,183007 | -0,521293 | 36            | H36 | -0,881325   | -2,831638 | -0,235248 |
| 18            | C18 | -2,944871   | -3,047625 | -0,839043 | 37            | H37 | -2,715339   | -3,755605 | -1,64149  |
| 20            | H20 | 1,829508    | -0,413181 | 0,745825  | 38            | H38 | -3,2629     | -3,624552 | 0,037179  |
| 21            | H21 | 3,020427    | 1,483983  | 0,068797  | 39            | H39 | -3,789099   | -2,432341 | -1,161274 |
| 22            | H22 | 0,224535    | 2,491771  | 0,772943  |               |     |             |           |           |

**Table S14.** Conformer 12 of 12 (SR\_12).

| Center Number |     | Coordinates |           |           | Center Number |     | Coordinates |           |           |
|---------------|-----|-------------|-----------|-----------|---------------|-----|-------------|-----------|-----------|
|               |     | X           | Y         | Z         |               |     | X           | Y         | Z         |
| 2             | C2  | 1,384409    | 0,053347  | -0,080571 | 23            | H23 | 1,617222    | 3,346966  | 1,051603  |
| 3             | C3  | 1,881041    | 1,510223  | -0,03508  | 24            | H24 | 2,164624    | 1,932832  | 2,980968  |
| 4             | C4  | 1,1718      | 2,347122  | 1,04158   | 25            | H25 | 0,59203     | 0,413385  | 3,887911  |
| 5             | C5  | 1,271136    | 1,706456  | 2,400428  | 26            | H26 | -1,44379    | 1,217684  | 1,808514  |
| 6             | C6  | 0,382401    | 0,845298  | 2,910056  | 27            | H27 | -1,534217   | -0,072058 | 3,007616  |
| 7             | C7  | -0,891567   | 0,376821  | 2,245775  | 28            | H28 | 0,02407     | -1,442571 | 1,465316  |
| 8             | C8  | -0,63205    | -0,64062  | 1,098624  | 29            | H29 | 1,315213    | -0,38289  | -2,192084 |
| 9             | C9  | 1,829439    | -0,761693 | -1,303647 | 30            | H30 | 1,506498    | -1,794745 | -1,150355 |
| 10            | C10 | 3,323019    | -0,690076 | -1,509752 | 31            | H31 | 3,686766    | 0,209259  | -2,011517 |
| 11            | C11 | 4,189342    | -1,891004 | -1,601085 | 32            | H32 | 5,126707    | -1,801731 | -2,153935 |
| 12            | C12 | 3,649636    | -3,227447 | -1,537048 | 33            | H33 | 2,805002    | -5,335674 | -1,473525 |
| 13            | C13 | 3,205248    | -4,34945  | -1,505154 | 34            | H34 | -2,457551   | -0,512802 | -0,027937 |
| 16            | C16 | -1,933697   | -1,256029 | 0,576549  | 35            | H35 | -3,296035   | -1,066699 | 2,198744  |
| 17            | C17 | -2,86986    | -1,88798  | 1,605722  | 36            | H36 | -3,71237    | -2,337003 | 1,069785  |
| 18            | C18 | -2,229932   | -2,923516 | 2,535273  | 37            | H37 | -1,433877   | -2,488276 | 3,148603  |
| 20            | H20 | 1,82024     | -0,418946 | 0,809895  | 38            | H38 | -2,979855   | -3,340126 | 3,214606  |
| 21            | H21 | 2,964561    | 1,50159   | 0,116822  | 39            | H39 | -1,798931   | -3,746725 | 1,95892   |
| 22            | H22 | 0,126423    | 2,448908  | 0,736976  |               |     |             |           |           |

Figure S34. DP4 app for (3*R*,4*S*)-epoxy-pinnatifidenyne 3.

Assignment of stereochemistry and structure using NMR and DP4

Please select version of database to use:

DP4-original  
**DP4-database2**

Select probability distribution:

t distribution (recommended)  
 normal distribution

**13C Calc:**  
C1,C2,C3,C4,C5,C6,C7,C8,C9,C10,C11,C12,C14,68.4,71.2,43.6,55.4,32.9,81.1,74.4,35.8,128.8,131.9,68.3,70.8,44.0,56.3,33.9,80.9,74.8,35.9,128.6,131.9

**1H Calc:**  
H2,H3,H4,H5,H6,H7,H8,H9,H10,H11,H12,H13,H14,3.18,3.04,1.84,2.19,4.14,4.15,3.08,2.37,5.83,5.96,2.32,4.3,3.24,3.07,2.11,1.69,4.16,3.90,3.08,2.35,5.78,5.96,2.32

**13C Expt:**  
74.5(C1),78.6(C2),45.6(C3),55.3(C4),34.3(C5),77.5(C6),74.8(C7),70.8(C8),44.0(C9),56.3(C10),33.9(C11),80.9(C12),74.8(C13),35.9(C14),128.6(C15),131.9(C16)

**1H Expt:**  
3.52(H2),3.25(H3),2.35(H4),1.64(H5),4.12(H6),3.95(H7),2.11(H8),1.69(H9),4.16(H10),3.08(H11),2.35(H12),5.78(H13),5.96(H14)

**Read Data** **Show Assignments** **Calculate** **Clear**

This calculation will use the DP4-database2 version of the database and the t distribution. (To change these options select the desired database and distribution from the menus at the top of the applet and then click Calculate).

Results of DP4 using both carbon and proton data:  
Isomer 1: 0,1%  
Isomer 2: 99,9%

Results of DP4 using the carbon data only:  
Isomer 1: 49,3%  
Isomer 2: 50,7%

Results of DP4 using the proton data only:  
Isomer 1: 0,1%  
Isomer 2: 99,9%

(c) Jonathan M Goodman and Steven G Smith

**Table S15.** Antiproliferative activity against human cancer cell lines.

| Compound | GI <sub>50</sub> (μM) |         |          |          |          |      |
|----------|-----------------------|---------|----------|----------|----------|------|
|          | A549                  | HBL-100 | HeLa     | SW1573   | T-47D    | WiDr |
| <b>3</b> | >50                   | >50     | >50      | >50      | >50      | >50  |
| <b>4</b> | 33 ± 17               | >50     | 45 ± 6.7 | >50      | >50      | >50  |
| <b>5</b> | 35 ± 4.9              | >50     | 36 ± 14  | 13 ± 0.6 | 48 ± 3.8 | >50  |
| <b>6</b> | >50                   | >50     | >50      | >50      | >50      | >50  |
